# Supplementary material for: Genome-Wide Characterization Reveals Variation Potentially Involved in Pathogenicity and Mycotoxins Biosynthesis of Fusarium proliferatum Causing Spikelet Rot Disease in Rice
Source: MDPI journal article supplement (doi:10.3390/toxins14080568), 2022-08-19
Supplement: s1 [file s1]

## Supplementary Materials

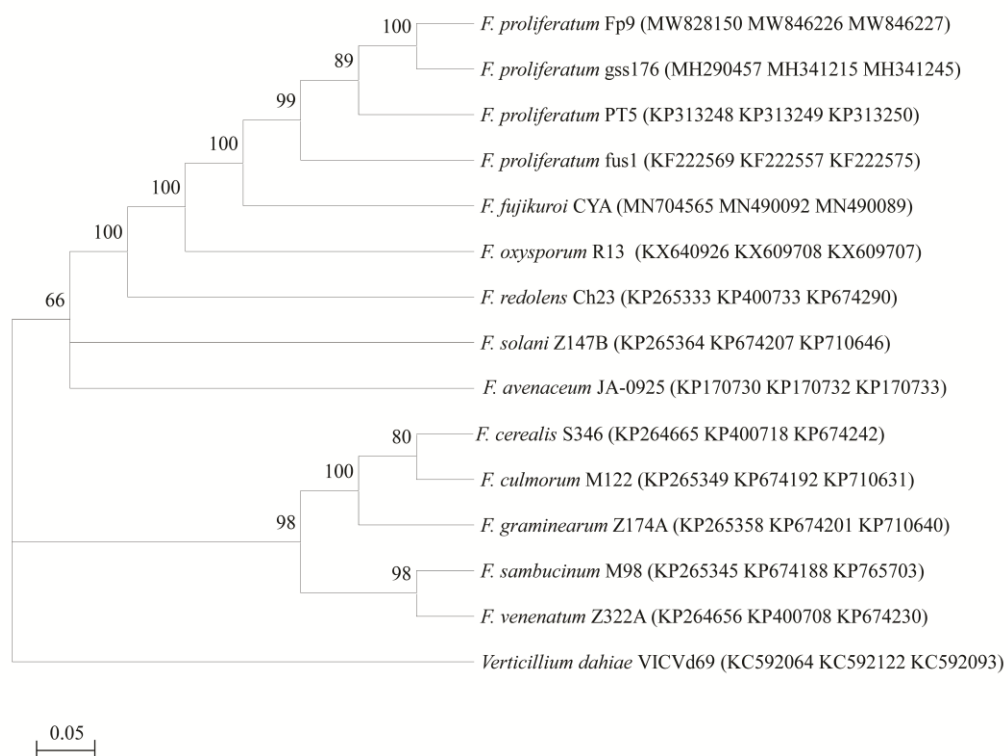

**Figure S1.** Neighbor-joining tree inferred from the concatenated nucleotide sequences of *ITS*, *TEF1 $\alpha$*  and  $\beta$ -*TUB* of the strains of *F. proliferatum* and other *Fusarium* species.

Note: *Verticillium dahliae* was used as an outgroup. The GenBank accession numbers from left to right in parentheses were the sequences of *ITS*, *TEF* and  $\beta$ -*TUB* genes, respectively. Numbers near branches were bootstrap values based on 1,000 replicates.

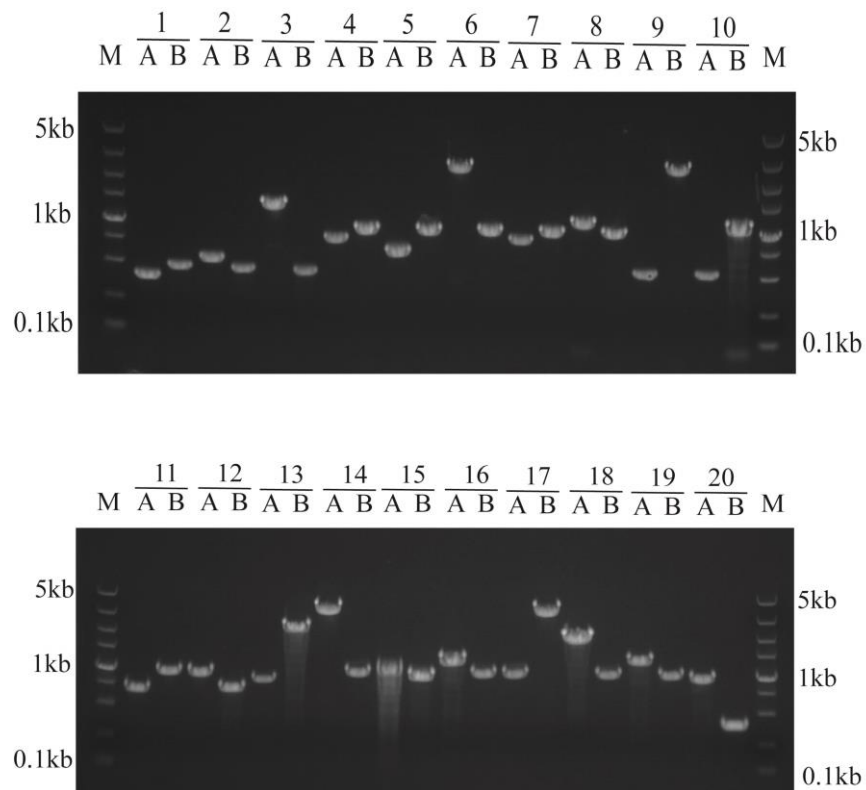

**Figure S2.** Gel electrophoresis images of PCR validation of structural variants (SVs) between *F. proliferatum* and *F. fujikuroi*

Note: PCR reactions used DNA from the *F. proliferatum* (A) and *F. fujikuroi* (B). Gel electrophoresis images of PCR products corresponding to the SVs in Table S3. Numbers above the small horizontal line represented SV ID. PCR validations of SV1 to SV10 was in top and SV11 to SV20 was in bottom, respectively.

**Table S1** Specific regions in the subtelomeres present in *E. proliferatum* but absent in *E. fujikuroi*

| Scaffold     | Left/Right arms | Locus boundary   | Fragments (bp) |
|--------------|-----------------|------------------|----------------|
| Scaffold I   | Left            | 35777: 42225     | 6448           |
| Scaffold I   | Right           | 6080517: 6114445 | 33928          |
| Scaffold II  | Left            | 126954: 138359   | 11405          |
| Scaffold II  | Right           | 4594735: 4601872 | 7137           |
| Scaffold II  | Right           | 4729844: 4744065 | 14221          |
| Scaffold IV  | Left            | 14338: 70572     | 56234          |
| Scaffold IV  | Right           | 4454458: 4479090 | 24632          |
| Scaffold VII | Right           | 2897101: 2974289 | 77188          |
| Scaffold IX  | Right           | 2876122: 2929835 | 53713          |
| Scaffold IX  | Right           | 2973049: 3023339 | 50290          |
| Scaffold X   | Left            | 26521: 36495     | 9974           |
| Scaffold X   | Right           | 79679: 91925     | 12246          |
| Scaffold XI  | Left            | 10360: 18871     | 8511           |
| Scaffold XI  | Right           | 339337: 364692   | 25355          |
| Scaffold XII | Left            | 12623: 47357     | 34734          |
| Scaffold XII | Right           | 619632: 674151   | 54519          |

**Table S2** GO enrichment analysis of genes present in the genome of *F. proliferatum* and absent in that of *F. fujikuroi*

| Type               | GO ID      | Function                                                              | No. of genes present in <i>F. proliferatum</i> | No. of genes present in <i>F. fujikuroi</i> |
|--------------------|------------|-----------------------------------------------------------------------|------------------------------------------------|---------------------------------------------|
| Biological Process | GO:0005975 | carbohydrate metabolic process                                        | 1                                              | 5                                           |
|                    | GO:0006139 | nucleobase, nucleoside, nucleotide and nucleic acid metabolic process | 1                                              | 0                                           |
|                    | GO:0006200 | ATP catabolic process                                                 | 1                                              | 0                                           |
|                    | GO:0006313 | transposition, DNA-mediated                                           | 0                                              | 1                                           |
|                    | GO:0006351 | transcription, DNA-dependent                                          | 2                                              | 4                                           |
|                    | GO:0006357 | regulation of transcription from RNA polymerase II promoter           | 3                                              | 0                                           |
|                    | GO:0006412 | translation                                                           | 1                                              | 0                                           |
|                    | GO:0006418 | tRNA aminoacylation for protein translation                           | 1                                              | 0                                           |
|                    | GO:0006457 | protein folding                                                       | 1                                              | 0                                           |
|                    | GO:0006508 | proteolysis                                                           | 2                                              | 0                                           |
|                    | GO:0006520 | cellular amino acid metabolic process                                 | 0                                              | 1                                           |
|                    | GO:0006629 | lipid metabolic process                                               | 0                                              | 3                                           |
|                    | GO:0006807 | nitrogen compound metabolic process                                   | 2                                              | 0                                           |
|                    | GO:0006950 | response to stress                                                    | 0                                              | 1                                           |
|                    | GO:0007155 | cell adhesion                                                         | 0                                              | 1                                           |
|                    | GO:0008152 | metabolic process                                                     | 0                                              | 5                                           |
|                    | GO:0008643 | carbohydrate transport                                                | 1                                              | 0                                           |
|                    | GO:0009058 | biosynthetic process                                                  | 0                                              | 1                                           |
|                    | GO:0009081 | branched chain family amino acid metabolic process                    | 1                                              | 0                                           |
|                    | GO:0009098 | leucine biosynthetic process                                          | 1                                              | 0                                           |
|                    | GO:0009116 | nucleoside metabolic process                                          | 1                                              | 3                                           |
|                    | GO:0009409 | response to cold                                                      | 1                                              | 0                                           |
|                    | GO:0009637 | response to blue light                                                | 2                                              | 0                                           |
|                    | GO:0009765 | photosynthesis, light harvesting                                      | 1                                              | 0                                           |

|                    |            |                                                      |   |    |
|--------------------|------------|------------------------------------------------------|---|----|
|                    | GO:0010114 | response to red light                                | 2 | 0  |
|                    | GO:0010218 | response to far red light                            | 1 | 0  |
|                    | GO:0015074 | DNA integration                                      | 0 | 6  |
|                    | GO:0016042 | lipid catabolic process                              | 0 | 2  |
|                    | GO:0016310 | phosphorylation                                      | 1 | 0  |
|                    | GO:0018298 | protein-chromophore linkage                          | 1 | 0  |
|                    | GO:0019253 | reductive pentose-phosphate cycle                    | 1 | 0  |
|                    | GO:0031221 | arabinan metabolic process                           | 0 | 1  |
|                    | GO:0044237 | cellular metabolic process                           | 1 | 0  |
|                    | GO:0044249 | cellular biosynthetic process                        | 1 | 0  |
|                    | GO:0045454 | cell redox homeostasis                               | 0 | 2  |
|                    | GO:0046148 | pigment biosynthetic process                         | 1 | 0  |
|                    | GO:0046373 | L-arabinose metabolic process                        | 0 | 1  |
|                    | GO:0055085 | transmembrane transport                              | 3 | 8  |
|                    | GO:0055114 | oxidation-reduction process                          | 7 | 0  |
|                    | GO:0070941 | eisosome assembly                                    | 0 | 11 |
| Cellular Component | GO:0071704 | organic substance metabolic process                  | 1 | 0  |
|                    | GO:0000124 | SAGA complex                                         | 1 | 0  |
|                    | GO:0005618 | cell wall                                            | 1 | 0  |
|                    | GO:0005623 | cell                                                 | 0 | 2  |
|                    | GO:0005634 | nucleus                                              | 1 | 9  |
|                    | GO:0005737 | cytoplasm                                            | 1 | 0  |
|                    | GO:0005739 | mitochondrion                                        | 1 | 0  |
|                    | GO:0005832 | chaperonin-containing T-complex                      | 1 | 0  |
|                    | GO:0009522 | photosystem I                                        | 1 | 0  |
|                    | GO:0009523 | photosystem II                                       | 1 | 0  |
|                    | GO:0009535 | chloroplast thylakoid membrane                       | 2 | 0  |
|                    | GO:0009573 | chloroplast ribulose biphosphate carboxylase complex | 1 | 0  |

|                               |            |                                                                               |   |    |
|-------------------------------|------------|-------------------------------------------------------------------------------|---|----|
|                               | GO:0009941 | chloroplast envelope                                                          | 1 | 0  |
|                               | GO:0010287 | plastoglobule                                                                 | 1 | 0  |
|                               | GO:0016020 | membrane                                                                      | 1 | 0  |
|                               | GO:0016021 | integral to membrane                                                          | 3 | 57 |
|                               | GO:0022626 | cytosolic ribosome                                                            | 1 | 0  |
|                               | GO:0031977 | thylakoid lumen                                                               | 1 | 0  |
|                               | GO:0032126 | eisosome                                                                      | 0 | 11 |
|                               | GO:0048046 | apoplast                                                                      | 3 | 0  |
| <b>Molecular<br/>Function</b> | GO:0000166 | nucleotide binding                                                            | 4 | 0  |
|                               | GO:0000287 | magnesium ion binding                                                         | 1 | 0  |
|                               | GO:0000981 | sequence-specific DNA binding RNA polymerase II transcription factor activity | 3 | 8  |
|                               | GO:0003676 | nucleic acid binding                                                          | 0 | 13 |
|                               | GO:0003677 | DNA binding                                                                   | 1 | 6  |
|                               | GO:0003700 | DNA-binding transcription factor activity                                     | 0 | 2  |
|                               | GO:0003824 | catalytic activity                                                            | 0 | 5  |
|                               | GO:0003862 | 3-isopropylmalate dehydrogenase activity                                      | 1 | 0  |
|                               | GO:0003924 | GTPase activity                                                               | 0 | 1  |
|                               | GO:0003979 | UDP-glucose 6-dehydrogenase activity                                          | 1 | 0  |
|                               | GO:0003995 | acyl-CoA dehydrogenase activity                                               | 2 | 0  |
|                               | GO:0004040 | amidase activity                                                              | 0 | 1  |
|                               | GO:0004084 | branched-chain-amino-acid transaminase activity                               | 1 | 0  |
|                               | GO:0004177 | aminopeptidase activity                                                       | 1 | 0  |
|                               | GO:0004252 | serine-type endopeptidase activity                                            | 1 | 2  |
|                               | GO:0004386 | helicase activity                                                             | 0 | 1  |
|                               | GO:0004402 | histone acetyltransferase activity                                            | 0 | 1  |
|                               | GO:0004497 | monooxygenase activity                                                        | 3 | 1  |
|                               | GO:0004553 | hydrolase activity, hydrolyzing O-glycosyl compounds                          | 1 | 5  |

|            |                                                                                       |   |   |
|------------|---------------------------------------------------------------------------------------|---|---|
| GO:0004672 | protein kinase activity                                                               | 0 | 5 |
| GO:0004806 | triglyceride lipase activity                                                          | 0 | 1 |
| GO:0004812 | aminoacyl-tRNA ligase activity                                                        | 1 | 0 |
| GO:0005506 | iron ion binding                                                                      | 1 | 1 |
| GO:0005507 | copper ion binding                                                                    | 1 | 0 |
| GO:0005524 | ATP binding                                                                           | 2 | 7 |
| GO:0005525 | GTP binding                                                                           | 0 | 2 |
| GO:0008061 | chitin binding                                                                        | 0 | 2 |
| GO:0008081 | phosphoric diester hydrolase activity                                                 | 0 | 2 |
| GO:0008171 | O-methyltransferase activity                                                          | 0 | 1 |
| GO:0008233 | peptidase activity                                                                    | 1 | 0 |
| GO:0008236 | serine-type peptidase activity                                                        | 0 | 1 |
| GO:0008237 | metallopeptidase activity                                                             | 1 | 2 |
| GO:0008239 | dipeptidyl-peptidase activity                                                         | 1 | 0 |
| GO:0008270 | zinc ion binding                                                                      | 1 | 9 |
| GO:0008408 | 3'-5' exonuclease activity                                                            | 0 | 1 |
| GO:0008483 | transaminase activity                                                                 | 1 | 1 |
| GO:0009055 | electron transfer activity                                                            | 0 | 1 |
| GO:0009853 | photorespiration                                                                      | 1 | 0 |
| GO:0010218 | response to far red light                                                             | 1 | 0 |
| GO:0010484 | H3 histone acetyltransferase activity                                                 | 1 | 0 |
| GO:0016168 | chlorophyll binding                                                                   | 1 | 0 |
| GO:0016301 | kinase activity                                                                       | 2 | 0 |
| GO:0016407 | acetyltransferase activity                                                            | 0 | 1 |
| GO:0016491 | oxidoreductase activity                                                               | 4 | 7 |
| GO:0016614 | oxidoreductase activity, acting on CH-OH group of donors                              | 0 | 2 |
| GO:0016616 | oxidoreductase activity, acting on the CH-OH group of donors, NAD or NADP as acceptor | 0 | 1 |

|            |                                                                                                                               |   |   |
|------------|-------------------------------------------------------------------------------------------------------------------------------|---|---|
| GO:0016620 | oxidoreductase activity, acting on the aldehyde or oxo group of donors, NAD or NADP as acceptor                               | 0 | 1 |
| GO:0016702 | oxidoreductase activity, acting on single donors with incorporation of molecular oxygen, incorporation of two atoms of oxygen | 0 | 1 |
| GO:0016705 | oxidoreductase activity, acting on paired donors, with incorporation or reduction of molecular oxygen                         | 1 | 1 |
| GO:0016747 | transferase activity, transferring acyl groups other than amino-acyl groups                                                   | 0 | 1 |
| GO:0016758 | transferase activity, transferring hexosyl groups                                                                             | 1 | 0 |
| GO:0016772 | transferase activity, transferring phosphorus-containing groups                                                               | 1 | 0 |
| GO:0016787 | hydrolase activity                                                                                                            | 1 | 7 |
| GO:0016798 | hydrolase activity, acting on glycosyl bonds                                                                                  | 1 | 0 |
| GO:0016810 | hydrolase activity, acting on carbon-nitrogen (but not peptide) bonds                                                         | 1 | 1 |
| GO:0016829 | lyase activity                                                                                                                | 1 | 1 |
| GO:0016836 | hydro-lyase activity                                                                                                          | 0 | 1 |
| GO:0016853 | isomerase activity                                                                                                            | 0 | 2 |
| GO:0016984 | ribulose-bisphosphate carboxylase activity                                                                                    | 1 | 0 |
| GO:0020037 | heme binding                                                                                                                  | 1 | 1 |
| GO:0022857 | transmembrane transporter activity                                                                                            | 0 | 1 |
| GO:0022891 | substrate-specific transmembrane transporter activity                                                                         | 1 | 0 |
| GO:0030151 | molybdenum ion binding                                                                                                        | 0 | 1 |
| GO:0030170 | pyridoxal phosphate binding                                                                                                   | 0 | 2 |
| GO:0030246 | carbohydrate binding                                                                                                          | 0 | 1 |
| GO:0042626 | ATPase activity, coupled to transmembrane movement of substances                                                              | 1 | 0 |
| GO:0043169 | cation binding                                                                                                                | 1 | 0 |
| GO:0043531 | ADP binding                                                                                                                   | 0 | 2 |
| GO:0046556 | alpha-L-arabinofuranosidase activity                                                                                          | 0 | 1 |
| GO:0046872 | metal ion binding                                                                                                             | 4 | 3 |



|            |                                                     |   |   |
|------------|-----------------------------------------------------|---|---|
| GO:0046873 | metal ion transmembrane transporter activity        | 0 | 1 |
| GO:0050660 | flavin adenine dinucleotide binding                 | 1 | 2 |
| GO:0050662 | coenzyme binding                                    | 1 | 0 |
| GO:0051082 | unfolded protein binding                            | 1 | 0 |
| GO:0051213 | dioxygenase activity                                | 0 | 1 |
| GO:0051287 | NAD binding                                         | 2 | 0 |
| GO:0051537 | 2 iron, 2 sulfur cluster binding                    | 0 | 1 |
| GO:0051920 | peroxiredoxin activity                              | 0 | 1 |
| GO:0052664 | nitroalkane oxidase activity                        | 1 | 0 |
| GO:0070011 | peptidase activity, acting on L-amino acid peptides | 1 | 0 |
| GO:0071949 | FAD binding                                         | 1 | 2 |
| GO:0071704 | organic substance metabolic process                 | 1 | 0 |

**Table S3** Summary of PCR validations of structural variants (SVs) between *F. proliferatum* and *F. fujikuroi*

| SV ID | SV class  | SV size (bp) | A (bp) | B (bp) | Forward Primer (5'-3') | Reverse Primer (5'-3') |
|-------|-----------|--------------|--------|--------|------------------------|------------------------|
| 1     | Deletion  | 80           | 418    | 495    | AGGGGACAAGAGGTAAG      | TCAGGCTATCTGTGCAG      |
| 2     | Insertion | 101          | 610    | 509    | TAACCTCTCCTATCTCT      | ACGCTCCCTTGAACAAC      |
| 3     | Insertion | 892          | 1386   | 494    | ACTCAGTCTGTCCGTTG      | GGTCCTGTTTTCTCTA       |
| 4     | Deletion  | 162          | 840    | 1005   | CGGATAGTCGTCTTCAT      | AACTGATTGAGAGCCC       |
| 5     | Deletion  | 280          | 728    | 1008   | ATGACAACCATGAATCA      | AACAAGAAGACCCTGTG      |
| 6     | Insertion | 1476         | 2443   | 968    | ATTTATGTGATGCCGCC      | ATCGACAACATCATGCTTGA   |
| 7     | Deletion  | 145          | 843    | 993    | GCCTCGGGATATGGAGG      | TCGAGAACAGGGATGAGG     |
| 8     | Insertion | 146          | 1107   | 959    | GTCTCCTCTTTCCTCAC      | GAACCAACAGAACCTTT      |
| 9     | Deletion  | 1968         | 573    | 2541   | AGGTCGGTGTGCGGTATC     | GCTTGTGTGCGGGTGTC      |
| 10    | Deletion  | 579          | 591    | 1170   | GCTGCCCATCATAAGTG      | TCACCCCAATCTCGGT       |
| 11    | Deletion  | 295          | 709    | 998    | CTCTAATAGTGATGCGAGGTG  | AGCGTTTTGTTTGGGTC      |
| 12    | Insertion | 206          | 973    | 767    | TGCCCAGTGATAACGA       | AGATGGAAAGAACATGATG    |
| 13    | Deletion  | 1383         | 848    | 2231   | ATGTCTTCAAATGTAACGAGA  | TGTGAGCCAGCGGGTTA      |
| 14    | Insertion | 2008         | 2915   | 908    | CCTCGGTTCTGCTGTCT      | TGTTTGCTGTGAAGTCT      |
| 15    | Insertion | 153          | 1103   | 950    | ACGGCGTTGGATATATA      | TACCAATGGTTCTCAAT      |
| 16    | Insertion | 290          | 1261   | 982    | ATGACTCTCGTGTTAAG      | TTCCATTTATTCTTTGAA     |
| 17    | Deletion  | 1850         | 985    | 2828   | GTTTCGTCGCCAAAGCT      | AACCATGAGGCTTCAGC      |
| 18    | Insertion | 1067         | 2017   | 950    | GCGTGTTGACCCATTTT      | CGCAACTTGATTAGCC       |
| 19    | Insertion | 409          | 1407   | 998    | AGTATCTGAACCAATGC      | AGAAGGAAGTAGTCGTG      |
| 20    | Insertion | 743          | 1105   | 362    | AAAGCAGTGGCGAACAT      | CAGCAAAACGAAAACGA      |

Note: A indicated PCR size (bp) in *F. proliferatum* strain Fp9; B indicated PCR size (bp) in *F. fujikuroi* strain IMI 58289.

**Table S4** Comparison of genes encoding for membrane transporters in *F. proliferatum* with that in other fungi

| Superfamilies                                 | TC No. | Subclass description                                                                                                                                 | FP  | FG  | MO  | BC  | SS  | NC  | AN  |
|-----------------------------------------------|--------|------------------------------------------------------------------------------------------------------------------------------------------------------|-----|-----|-----|-----|-----|-----|-----|
| Channels/Pores                                | 1.A    | $\alpha$ -Type channels                                                                                                                              | 69  | 76  | 64  | 64  | 118 | 52  | 52  |
|                                               | 1.B    | $\beta$ -Barrel porins                                                                                                                               | 1   | 1   | 2   | 0   | 2   | 1   | 0   |
|                                               | 1.C    | Pore-forming toxins(proteins and peptides)                                                                                                           | 6   | 4   | 5   | 7   | 12  | 6   | 4   |
|                                               | 1.F    | Vesicle Fusion Pores                                                                                                                                 | 5   | 8   | 6   | 3   | 7   | 4   | 6   |
|                                               | 1.H    | Paracellular channels                                                                                                                                | 5   | 5   | 3   | 3   | 6   | 3   | 3   |
|                                               | 1.I    | Membrane-bounded Channels                                                                                                                            | 10  | 8   | 5   | 3   | 7   | 5   | 4   |
|                                               | 1.P    | Non-Envelop Virus Penetration Complex: A complex of host cell proteins that allow non-envelop virus to penetrate the endoplasmic reticular membrane. | 2   | 3   | 2   | 1   | 2   | 3   | 3   |
|                                               | 1.Q    | Fungal Septal Pores                                                                                                                                  | 1   | 1   | 1   | 0   | 1   | 1   | 1   |
| Electrochemical potential-driven transporters | 2.A    | Porters (uniporters, symporters, antiporters)                                                                                                        | 905 | 772 | 501 | 517 | 879 | 341 | 636 |
|                                               | 2.A.1  | The Major Facilitator Superfamily (MFS)                                                                                                              | 567 | 421 | 271 | 299 | 451 | 157 | 390 |
|                                               | 2.A.2  | The Glycoside-Pentoside-Hexuronide (GPH):Cation Symporter Family                                                                                     | 2   | 2   | 4   | 4   | 6   | 2   | 2   |
|                                               | 2.A.3  | The Amino Acid-Polyamine-Organocation (APC) Superfamily                                                                                              | 74  | 71  | 32  | 45  | 80  | 18  | 57  |
|                                               | 2.A.4  | The Cation Diffusion Facilitator (CDF) Family                                                                                                        | 9   | 7   | 8   | 6   | 13  | 9   | 6   |
|                                               | 2.A.5  | The Zinc ( $Zn^{2+}$ )-Iron ( $Fe^{2+}$ ) Permease (ZIP) Family                                                                                      | 10  | 9   | 8   | 8   | 14  | 8   | 7   |
|                                               | 2.A.6  | The Resistance-Nodulation-Cell Division (RND) Superfamily                                                                                            | 3   | 3   | 3   | 3   | 6   | 3   | 2   |
|                                               | 2.A.7  | The Drug/Metabolite Transporter (DMT) Superfamily                                                                                                    | 24  | 29  | 23  | 16  | 41  | 21  | 20  |
|                                               | 2.A.9  | The Membrane Protein Insertase (YidC/Alb3/Oxa1) Family                                                                                               | 2   | 1   | 1   | 1   | 4   | 1   | 2   |
|                                               | 2.A.16 | The Tellurite-resistance/Dicarboxylate Transporter (TDT) Family                                                                                      | 8   | 12  | 5   | 5   | 6   | 3   | 4   |
|                                               | 2.A.17 | The Proton-dependent Oligopeptide Transporter (POT) Family                                                                                           | 6   | 5   | 4   | 3   | 9   | 2   | 4   |
|                                               | 2.A.18 | The Amino Acid/Auxin Permease (AAP) Family                                                                                                           | 26  | 32  | 12  | 12  | 22  | 6   | 14  |
|                                               | 2.A.19 | The $Ca^{2+}$ :Cation Antiporter (CaCA) Family                                                                                                       | 8   | 10  | 7   | 10  | 19  | 10  | 6   |
|                                               | 2.A.20 | The Inorganic Phosphate Transporter (PiT) Family                                                                                                     | 4   | 4   | 3   | 1   | 2   | 0   | 4   |
|                                               | 2.A.21 | The Solute:Sodium Symporter (SSS) Family                                                                                                             | 5   | 3   | 3   | 2   | 2   | 3   | 4   |
|                                               | 2.A.22 | The Neurotransmitter:Sodium Symporter (NSS) Family                                                                                                   | 2   | 3   | 3   | 0   | 0   | 0   | 1   |
|                                               | 2.A.23 | The Dicarboxylate/Amino Acid:Cation ( $Na^+$ or $H^+$ ) Symporter (DAACS) Family                                                                     | 1   | 1   | 1   | 0   | 0   | 0   | 1   |

|        |                                                                                |    |    |    |    |    |    |    |
|--------|--------------------------------------------------------------------------------|----|----|----|----|----|----|----|
| 2.A.25 | The Alanine or Glycine:Cation Symporter (AGCS) Family                          | 0  | 0  | 1  | 0  | 1  | 0  | 0  |
| 2.A.28 | The Bile Acid:Na <sup>+</sup> Symporter (BASS) Family                          | 1  | 1  | 1  | 0  | 0  | 0  | 1  |
| 2.A.29 | The Mitochondrial Carrier (MC) Family                                          | 17 | 16 | 13 | 14 | 23 | 16 | 17 |
| 2.A.30 | The Cation-Chloride Cotransporter (CCC) Family                                 | 1  | 1  | 1  | 1  | 2  | 1  | 1  |
| 2.A.31 | The Anion Exchanger (AE) Family                                                | 3  | 4  | 1  | 2  | 2  | 2  | 2  |
| 2.A.36 | The Monovalent Cation:Proton Antiporter-1 (CPA1) Family                        | 4  | 5  | 4  | 5  | 8  | 3  | 6  |
| 2.A.37 | The Monovalent Cation:Proton Antiporter-2 (CPA2) Family                        | 2  | 1  | 3  | 2  | 4  | 2  | 2  |
| 2.A.38 | The K <sup>+</sup> Transporter (Trk) Family                                    | 5  | 6  | 5  | 3  | 5  | 2  | 3  |
| 2.A.39 | The Nucleobase:Cation Symporter-1 (NCS1) Family                                | 13 | 9  | 7  | 8  | 17 | 3  | 11 |
| 2.A.40 | The Nucleobase:Cation Symporter-2 (NCS2) Family                                | 5  | 4  | 3  | 3  | 8  | 4  | 3  |
| 2.A.41 | The Concentrative Nucleoside Transporter (CNT) Family                          | 1  | 1  | 1  | 0  | 0  | 1  | 1  |
| 2.A.43 | The Lysosomal Cystine Transporter (LCT) Family                                 | 6  | 6  | 7  | 5  | 12 | 7  | 5  |
| 2.A.47 | The Divalent Anion:Na <sup>+</sup> Symporter (DASS) Family                     | 1  | 2  | 1  | 1  | 2  | 1  | 1  |
| 2.A.49 | The Chloride Carrier/Channel (ClC) Family                                      | 4  | 5  | 3  | 3  | 7  | 4  | 3  |
| 2.A.50 | The Glycerol Uptake (GUP) Family                                               | 1  | 1  | 1  | 1  | 2  | 2  | 1  |
| 2.A.51 | The Chromate Ion Transporter (CHR) Family                                      | 1  | 2  | 1  | 0  | 0  | 1  | 2  |
| 2.A.52 | The Ni <sup>2+</sup> -Co <sup>2+</sup> Transporter (NiCoT) Family              | 1  | 2  | 2  | 1  | 2  | 1  | 1  |
| 2.A.53 | The Sulfate Permease (SulP) Family                                             | 7  | 8  | 8  | 4  | 10 | 4  | 4  |
| 2.A.54 | The Mitochondrial Tricarboxylate Carrier (MTC) Family                          | 1  | 1  | 1  | 1  | 2  | 1  | 1  |
| 2.A.55 | The Metal Ion (Mn <sup>2+</sup> -iron) Transporter (Nramp) Family              | 2  | 1  | 0  | 1  | 4  | 2  | 1  |
| 2.A.57 | The Equilibrative Nucleoside Transporter (ENT) Family                          | 3  | 4  | 2  | 2  | 4  | 1  | 2  |
| 2.A.59 | The Arsenical Resistance-3 (ACR3) Family                                       | 2  | 1  | 1  | 1  | 2  | 1  | 1  |
| 2.A.66 | The Multidrug/Oligosaccharidyl-lipid/Polysaccharide (MOP) Flippase Superfamily | 6  | 8  | 4  | 3  | 7  | 5  | 5  |
| 2.A.67 | The Oligopeptide Transporter (OPT) Family                                      | 13 | 13 | 12 | 12 | 23 | 11 | 6  |
| 2.A.69 | The Auxin Efflux Carrier (AEC) Family                                          | 1  | 2  | 2  | 3  | 6  | 2  | 2  |
| 2.A.72 | The K <sup>+</sup> Uptake Permease (KUP) Family                                | 1  | 1  | 1  | 1  | 2  | 0  | 0  |
| 2.A.77 | The Cadmium Resistance (CadD) Family                                           | 1  | 1  | 1  | 0  | 0  | 0  | 0  |

|                             |         |                                                                                                                               |     |     |     |     |     |    |    |
|-----------------------------|---------|-------------------------------------------------------------------------------------------------------------------------------|-----|-----|-----|-----|-----|----|----|
|                             | 2.A.79  | The Threonine/Serine Exporter (ThrE) Family                                                                                   | 2   | 2   | 1   | 1   | 2   | 1  | 3  |
|                             | 2.A.82  | The Organic Solute Transporter (OST) Family                                                                                   | 2   | 2   | 2   | 3   | 4   | 2  | 2  |
|                             | 2.A.85  | The Aromatic Acid Exporter (ArAE) Family                                                                                      | 6   | 7   | 2   | 5   | 8   | 2  | 4  |
|                             | 2.A.89  | The Vacuolar Iron Transporter (VIT) Family                                                                                    | 2   | 2   | 1   | 1   | 2   | 1  | 2  |
|                             | 2.A.90  | The Vitamin A Receptor/Transporter (STRA6) Family                                                                             | 1   | 1   | 1   | 1   | 2   | 1  | 1  |
|                             | 2.A.92  | The Choline Transporter-like (CTL) Family                                                                                     | 1   | 1   | 1   | 0   | 1   |    | 1  |
|                             | 2.A.94  | The Phosphate Permease (Pho1) Family                                                                                          | 2   | 2   | 3   | 2   | 4   | 3  | 2  |
|                             | 2.A.96  | The YaaH (YaaH) Family                                                                                                        | 11  | 7   | 2   | 3   | 4   | 1  | 6  |
|                             | 2.A.97  | The Mitochondrial Inner Membrane K <sup>+</sup> /H <sup>+</sup> and Ca <sup>2+</sup> /H <sup>+</sup> Exchanger (LetM1) Family | 0   | 0   | 1   | 1   | 2   | 1  | 1  |
|                             | 2.A.100 | The Ferroportin (Fpn) Family                                                                                                  | 1   | 2   | 1   | 1   | 2   | 1  | 1  |
|                             | 2.A.105 | The Mitochondrial Pyruvate Carrier (MPC) Family                                                                               | 1   | 1   | 3   | 1   | 2   | 2  | 1  |
|                             | 2.A.106 | The Ca <sup>2+</sup> -H <sup>+</sup> Antiporter-2 (CaCA2) Family                                                              | 1   | 2   | 1   | 1   | 2   | 1  | 1  |
|                             | 2.A.108 | The Iron/Lead Transporter (ILT) Family                                                                                        | 9   | 9   | 4   | 3   | 6   | 2  |    |
|                             | 2.A.121 | The Sulfate Transporter (CysZ) Family                                                                                         | 2   | 3   | 3   | 1   | 4   | 2  | 2  |
|                             | 2.A.122 | The LrgB/CidB Holin-like Glycolate/Glycerate Transporter (LrgB/CidB/GGT) Family                                               | 2   | 2   | 0   | 0   | 2   | 0  | 0  |
|                             | 2.A.126 | The Fatty Acid Exporter (FAX) Family                                                                                          | 1   | 2   | 0   | 1   | 2   | 1  | 2  |
|                             | 2.A.127 | The Enterobacterial Cardiolipin Transporter (CLT) Family                                                                      | 7   | 8   | 0   | 0   | 0   | 0  | 1  |
| Primary active transporters | 3.A     | P-P-bond-hydrolysis-driven transporters                                                                                       | 127 | 147 | 111 | 105 | 187 | 75 | 99 |
|                             | 3.A.1   | The ATP-binding Cassette (ABC) Superfamily                                                                                    | 59  | 65  | 42  | 47  | 79  | 27 | 45 |
|                             | 3.A.2   | The H <sup>+</sup> - or Na <sup>+</sup> -translocating F-type, V-type and A-type ATPase (F-ATPase) Superfamily                | 7   | 12  | 8   | 6   | 14  | 3  | 6  |
|                             | 3.A.3   | The P-type ATPase (P-ATPase) Superfamily                                                                                      | 30  | 32  | 24  | 20  | 33  | 19 | 21 |
|                             | 3.A.4   | The Arsenite-Antimonite (ArsAB) Efflux Family                                                                                 | 1   | 1   | 1   | 0   | 2   | 0  | 0  |
|                             | 3.A.5   | The General Secretory Pathway (Sec) Family                                                                                    | 8   | 7   | 8   | 6   | 14  | 5  | 7  |
|                             | 3.A.8   | The Mitochondrial Protein Translocase (MPT) Family                                                                            | 5   | 5   | 5   | 8   | 12  | 1  | 6  |
|                             | 3.A.9   | The Chloroplast Envelope Protein Translocase (CEPT or Tic-Toc) Family                                                         | 0   | 3   | 3   | 1   | 0   | 0  | 0  |
|                             | 3.A.16  | The Endoplasmic Reticular Retrotranslocon (ER-RT) Fam                                                                         | 6   | 8   | 8   | 4   | 10  | 6  | 5  |

|                                         |        |                                                                                                |             |             |            |            |             |            |             |
|-----------------------------------------|--------|------------------------------------------------------------------------------------------------|-------------|-------------|------------|------------|-------------|------------|-------------|
|                                         | 3.A.19 | The TMS Recognition/Insertion Complex (TRC) Family                                             | 1           | 1           | 0          | 1          | 1           |            | 1           |
|                                         | 3.A.20 | The Peroxisomal Protein Importer (PPI) Family                                                  | 2           | 4           | 2          | 4          | 6           | 5          | 2           |
|                                         | 3.A.25 | The Symbiont-specific ERAD-like Machinery (SELMA) Family                                       | 1           | 0           | 1          | 0          | 1           | 1          | 1           |
|                                         | 3.A.27 | The C-terminal Tail-Anchored Membrane Protein Biogenesis/ Insertion Complex-2 (TAMP-B2) Family | 4           | 4           | 6          | 4          | 8           | 4          | 3           |
|                                         | 3.A.28 | The AAA-ATPase, Bcs1 (Bcs1) Family                                                             | 2           | 3           | 2          | 3          | 5           | 2          | 2           |
|                                         | 3.A.29 | The Mitochondrial Inner Membrane i-AAA Protease Complex (MIMP) Family                          | 1           | 2           | 1          | 1          | 2           | 2          | 0           |
|                                         | 3.B    | Decarboxylation-driven transporters                                                            | 0           | 0           | 0          | 0          | 0           | 0          | 1           |
|                                         | 3.D    | Oxidoreduction-driven transporters                                                             | 10          | 27          | 10         | 8          | 34          | 9          | 11          |
|                                         | 3.E    | Light absorption-driven transporters                                                           | 5           | 4           | 1          | 2          | 4           | 1          | 1           |
|                                         | 4.C    | Acyl CoA ligase-coupled transporters                                                           | 11          | 8           | 3          | 3          | 3           | 4          | 4           |
|                                         | 4.D    | Polysaccharide Synthase/Exporters                                                              | 27          | 31          | 14         | 21         | 44          | 14         | 14          |
|                                         | 4.E    | Vacuolar Polyphosphate Polymerase-catalyzed Group Translocators                                | 2           | 4           | 2          | 2          | 4           | 2          | 1           |
|                                         | 4.F    | Choline/EthanolaminePhosphotransferase 1 (CEPT1)                                               | 3           | 4           | 4          | 3          | 6           | 4          | 3           |
| Transmembrane electron carriers         | 5.B    | Transmembrane one-electron transfer carriers                                                   | 26          | 34          | 20         | 19         | 31          | 15         | 15          |
| Accessory electron carriers             | 8.A    | Auxiliary transport proteins                                                                   | 29          | 38          | 26         | 24         | 56          | 28         | 25          |
|                                         | 8.B    | Ribosomally synthesized protein/peptide toxins that target channels and carriers               | 0           | 1           | 1          | 0          | 0           | 0          | 0           |
| Incompletely characterized transporters | 9.A    | Recognized transporters of unknown biochemical mechanism                                       | 74          | 70          | 29         | 42         | 58          | 27         | 46          |
|                                         | 9.B    | Putative uncharacterized transport proteins                                                    | 84          | 103         | 87         | 65         | 164         | 75         | 81          |
| <b>Total</b>                            |        |                                                                                                | <b>1402</b> | <b>1349</b> | <b>897</b> | <b>892</b> | <b>1625</b> | <b>670</b> | <b>1010</b> |

Note: Organisms, FP, *Fusarium proliferatum*; FG, *Fusarium graminearum*; MO, *Magnaporthe oryzae*; BC, *Botrytis cinerea*; SS, *Sclerotinia sclerotiorum*; NC, *Neurospora crassa*; AN, *Aspergillus nidulans*.

**Table S5** Characterization of carbohydrate-active enzymes (CAZymes) of *F. proliferatum* and other fungi

| Species | Glycoside Hydrolase Family (GHs) |    |    |    |   |   |   |   |    |    |    |    |    |    |    |    |    |    |    |    |    |    |    |    |    |    |  |
|---------|----------------------------------|----|----|----|---|---|---|---|----|----|----|----|----|----|----|----|----|----|----|----|----|----|----|----|----|----|--|
|         | 1                                | 2  | 3  | 5  | 6 | 7 | 8 | 9 | 10 | 11 | 12 | 13 | 15 | 16 | 17 | 18 | 20 | 23 | 24 | 25 | 26 | 27 | 28 | 29 | 30 | 31 |  |
| FP      | 5                                | 10 | 25 | 19 | 1 | 3 | 0 | 0 | 5  | 3  | 4  | 9  | 4  | 24 | 6  | 18 | 4  | 0  | 1  | 0  | 0  | 4  | 12 | 3  | 3  | 8  |  |
| FG      | 3                                | 10 | 21 | 14 | 1 | 2 | 0 | 0 | 5  | 3  | 4  | 8  | 3  | 24 | 6  | 19 | 3  | 0  | 0  | 0  | 0  | 2  | 6  | 1  | 0  | 8  |  |
| FF      | 4                                | 9  | 24 | 18 | 1 | 3 | 0 | 0 | 3  | 3  | 4  | 10 | 3  | 24 | 6  | 17 | 4  | 0  | 1  | 0  | 0  | 3  | 8  | 2  | 2  | 8  |  |
| LM      | 3                                | 7  | 13 | 15 | 3 | 3 | 0 | 0 | 3  | 2  | 3  | 7  | 3  | 18 | 8  | 11 | 2  | 0  | 1  | 0  | 0  | 4  | 7  | 1  | 2  | 8  |  |
| MO      | 2                                | 8  | 18 | 13 | 3 | 6 | 0 | 0 | 6  | 5  | 3  | 11 | 2  | 18 | 7  | 17 | 3  | 0  | 1  | 0  | 0  | 4  | 4  | 4  | 1  | 6  |  |
| BC      | 3                                | 2  | 16 | 16 | 1 | 2 | 0 | 0 | 2  | 3  | 5  | 11 | 5  | 21 | 6  | 11 | 1  | 0  | 0  | 0  | 2  | 4  | 19 | 0  | 0  | 4  |  |
| SS      | 3                                | 2  | 13 | 14 | 1 | 3 | 0 | 0 | 2  | 3  | 5  | 10 | 4  | 20 | 6  | 14 | 1  | 0  | 0  | 1  | 1  | 4  | 17 | 0  | 0  | 6  |  |
| AN      | 3                                | 10 | 20 | 15 | 2 | 3 | 0 | 0 | 3  | 2  | 1  | 14 | 2  | 13 | 5  | 9  | 2  | 0  | 1  | 3  | 3  | 3  | 9  | 0  | 0  | 10 |  |
| NC      | 1                                | 5  | 9  | 7  | 3 | 5 | 0 | 0 | 4  | 2  | 1  | 10 | 2  | 14 | 4  | 12 | 1  | 0  | 0  | 1  | 1  | 0  | 2  | 0  | 2  | 5  |  |
| UB      | 0                                | 2  | 4  | 10 | 0 | 0 | 1 | 1 | 2  | 1  | 0  | 5  | 1  | 14 | 2  | 2  | 2  | 1  | 0  | 1  | 1  | 1  | 1  | 0  | 2  | 3  |  |
| MP      | 0                                | 1  | 2  | 10 | 0 | 0 | 0 | 1 | 1  | 1  | 0  | 4  | 1  | 16 | 2  | 3  | 2  | 1  | 0  | 0  | 2  | 3  | 1  | 0  | 2  | 3  |  |

| Species | Glycoside Hydrolase Family (GHs) |    |    |    |    |    |    |    |    |    |    |    |    |    |    |    |    |    |    |    |    |    |    |    |    |    |
|---------|----------------------------------|----|----|----|----|----|----|----|----|----|----|----|----|----|----|----|----|----|----|----|----|----|----|----|----|----|
|         | 32                               | 33 | 35 | 36 | 37 | 38 | 39 | 42 | 43 | 45 | 47 | 49 | 51 | 53 | 54 | 55 | 62 | 63 | 64 | 65 | 67 | 71 | 72 | 74 | 75 | 76 |
| FP      | 7                                | 1  | 3  | 4  | 2  | 1  | 3  | 0  | 27 | 1  | 10 | 2  | 2  | 1  | 1  | 2  | 1  | 1  | 2  | 1  | 2  | 3  | 4  | 1  | 3  | 9  |
| FG      | 5                                | 1  | 3  | 3  | 2  | 1  | 2  | 0  | 18 | 1  | 10 | 0  | 2  | 1  | 1  | 0  | 2  | 1  | 2  | 0  | 1  | 0  | 3  | 1  | 1  | 8  |
| FF      | 6                                | 1  | 2  | 4  | 2  | 1  | 5  | 0  | 27 | 1  | 10 | 1  | 2  | 1  | 2  | 0  | 1  | 1  | 2  | 1  | 2  | 2  | 3  | 0  | 2  | 9  |
| LM      | 2                                | 4  | 4  | 2  | 2  | 1  | 1  | 0  | 12 | 2  | 8  | 0  | 3  | 1  | 0  | 0  | 1  | 3  | 1  | 1  | 1  | 1  | 6  | 0  | 0  | 7  |
| MO      | 5                                | 0  | 0  | 2  | 2  | 2  | 2  | 0  | 19 | 1  | 9  | 0  | 3  | 1  | 1  | 0  | 4  | 2  | 2  | 0  | 1  | 1  | 5  | 1  | 1  | 8  |
| BC      | 1                                | 0  | 4  | 2  | 1  | 1  | 1  | 0  | 5  | 2  | 8  | 0  | 4  | 2  | 1  | 0  | 1  | 1  | 2  | 2  | 0  | 11 | 6  | 0  | 0  | 11 |
| SS      | 1                                | 0  | 4  | 2  | 1  | 1  | 0  | 0  | 5  | 2  | 8  | 0  | 2  | 2  | 1  | 0  | 0  | 1  | 2  | 3  | 0  | 10 | 6  | 0  | 0  | 11 |
| AN      | 2                                | 0  | 4  | 4  | 1  | 1  | 1  | 0  | 18 | 1  | 7  | 0  | 2  | 1  | 1  | 6  | 2  | 1  | 0  | 1  | 1  | 5  | 5  | 2  | 2  | 7  |
| NC      | 0                                | 0  | 2  | 1  | 2  | 1  | 0  | 0  | 7  | 1  | 8  | 0  | 1  | 1  | 1  | 0  | 0  | 1  | 2  | 0  | 1  | 6  | 5  | 1  | 1  | 10 |
| UB      | 3                                | 0  | 1  | 1  | 2  | 1  | 0  | 1  | 3  | 4  | 3  | 0  | 3  | 0  | 1  | 0  | 1  | 1  | 0  | 0  | 0  | 0  | 1  | 0  | 0  | 0  |

|    |   |   |   |   |   |   |   |   |   |   |   |   |   |   |   |   |   |   |   |   |   |   |   |   |   |   |
|----|---|---|---|---|---|---|---|---|---|---|---|---|---|---|---|---|---|---|---|---|---|---|---|---|---|---|
| MP | 2 | 0 | 1 | 1 | 1 | 1 | 0 | 1 | 5 | 2 | 4 | 1 | 1 | 0 | 1 | 0 | 0 | 1 | 0 | 0 | 0 | 0 | 1 | 0 | 0 | 0 |
|----|---|---|---|---|---|---|---|---|---|---|---|---|---|---|---|---|---|---|---|---|---|---|---|---|---|---|

| Species | Glycoside Hydrolase Family (GHs) |    |    |    |    |    |    |    |    |    |     |     |     |     |     |     |     |     |     |     |     |     |     |     |     |                  |       |
|---------|----------------------------------|----|----|----|----|----|----|----|----|----|-----|-----|-----|-----|-----|-----|-----|-----|-----|-----|-----|-----|-----|-----|-----|------------------|-------|
|         | 78                               | 79 | 81 | 85 | 88 | 89 | 92 | 93 | 94 | 95 | 105 | 114 | 115 | 125 | 127 | 128 | 131 | 132 | 133 | 134 | 135 | 141 | 142 | 145 | 146 | No<br>classified | Total |
| FP      | 12                               | 1  | 3  | 0  | 3  | 0  | 0  | 3  | 0  | 1  | 3   | 3   | 2   | 3   | 1   | 3   | 1   | 3   | 1   | 0   | 0   | 0   | 0   | 0   | 0   | 0                | 308   |
| FG      | 7                                | 1  | 1  | 0  | 1  | 0  | 0  | 2  | 0  | 2  | 3   | 2   | 2   | 3   | 1   | 4   | 1   | 2   | 1   | 0   | 0   | 0   | 1   | 1   | 1   | 4                | 252   |
| FF      | 9                                | 2  | 3  | 0  | 3  | 0  | 0  | 4  | 0  | 2  | 4   | 2   | 2   | 3   | 2   | 4   | 1   | 2   | 1   | 1   | 0   | 0   | 1   | 1   | 1   | 6                | 299   |
| LM      | 1                                | 1  | 2  | 1  | 1  | 0  | 6  | 2  | 0  | 1  | 3   | 2   | 2   | 3   | 0   | 4   | 2   | 1   | 1   | 1   | 0   | 1   | 0   | 0   | 1   | 4                | 227   |
| MO      | 3                                | 2  | 2  | 0  | 1  | 0  | 6  | 1  | 1  | 1  | 4   | 1   | 3   | 6   | 0   | 5   | 6   | 2   | 2   | 0   | 0   | 0   | 0   | 1   | 2   | 2                | 265   |
| BC      | 8                                | 2  | 1  | 0  | 1  | 0  | 5  | 1  | 0  | 2  | 1   | 1   | 1   | 3   | 1   | 1   | 1   | 2   | 1   | 0   | 2   | 0   | 0   | 1   | 0   | 0                | 235   |
| SS      | 4                                | 2  | 1  | 0  | 0  | 1  | 5  | 1  | 0  | 1  | 1   | 1   | 1   | 3   | 0   | 3   | 2   | 2   | 1   | 0   | 3   | 0   | 0   | 0   | 0   | 9                | 233   |
| AN      | 8                                | 1  | 2  | 0  | 2  | 0  | 5  | 2  | 0  | 3  | 3   | 2   | 1   | 1   | 1   | 2   | 1   | 2   | 2   | 4   | 3   | 0   | 0   | 0   | 0   | 4                | 257   |
| NC      | 0                                | 2  | 1  | 0  | 0  | 0  | 2  | 2  | 1  | 0  | 1   | 1   | 1   | 3   | 0   | 2   | 3   | 2   | 1   | 0   | 0   | 0   | 2   | 1   | 0   | 2                | 170   |
| UB      | 0                                | 1  | 0  | 1  | 0  | 0  | 3  | 1  | 0  | 0  | 1   | 0   | 1   | 0   | 0   | 5   | 0   | 0   | 1   | 0   | 1   | 0   | 0   | 0   | 0   | 3                | 101   |
| MP      | 0                                | 1  | 0  | 1  | 0  | 0  | 2  | 1  | 0  | 0  | 1   | 0   | 1   | 1   | 0   | 5   | 0   | 0   | 1   | 0   | 0   | 0   | 0   | 0   | 0   | 5                | 98    |

| Species | Glycosyltransferase Family (GTs) |    |   |   |   |   |    |    |    |    |    |    |    |    |    |    |    |    |
|---------|----------------------------------|----|---|---|---|---|----|----|----|----|----|----|----|----|----|----|----|----|
|         | 1                                | 2  | 3 | 4 | 5 | 8 | 15 | 17 | 20 | 21 | 22 | 24 | 25 | 30 | 31 | 32 | 33 | 34 |
| FP      | 18                               | 1  | 1 | 0 | 0 | 7 | 5  | 2  | 3  | 1  | 4  | 1  | 0  | 1  | 7  | 5  | 1  | 3  |
| FG      | 16                               | 20 | 1 | 0 | 0 | 6 | 4  | 2  | 3  | 1  | 4  | 1  | 0  | 0  | 5  | 5  | 1  | 2  |
| FF      | 13                               | 23 | 1 | 0 | 0 | 7 | 5  | 2  | 3  | 1  | 4  | 1  | 0  | 0  | 6  | 6  | 1  | 3  |
| LM      | 6                                | 16 | 1 | 0 | 0 | 9 | 3  | 0  | 3  | 1  | 4  | 1  | 2  | 0  | 7  | 5  | 1  | 7  |
| MO      | 13                               | 11 | 1 | 0 | 1 | 2 | 4  | 1  | 3  | 1  | 4  | 1  | 6  | 0  | 4  | 10 | 1  | 2  |
| BC      | 13                               | 13 | 1 | 0 | 1 | 7 | 4  | 2  | 3  | 1  | 4  | 1  | 2  | 0  | 6  | 6  | 0  | 1  |
| SS      | 10                               | 17 | 1 | 0 | 1 | 6 | 4  | 2  | 3  | 1  | 4  | 1  | 3  | 0  | 6  | 4  | 1  | 2  |



|    |   |    |   |   |   |   |   |   |   |   |   |   |   |   |   |   |   |   |
|----|---|----|---|---|---|---|---|---|---|---|---|---|---|---|---|---|---|---|
| AN | 9 | 12 | 1 | 7 | 2 | 4 | 3 | 0 | 3 | 1 | 4 | 1 | 4 | 0 | 5 | 7 | 1 | 3 |
| NC | 6 | 11 | 1 | 0 | 2 | 2 | 5 | 1 | 3 | 1 | 3 | 1 | 1 | 0 | 3 | 4 | 1 | 2 |
| UB | 5 | 15 | 1 | 0 | 0 | 2 | 1 | 1 | 3 | 1 | 4 | 1 | 0 | 0 | 3 | 2 | 1 | 0 |
| MP | 5 | 13 | 1 | 0 | 0 | 2 | 2 | 0 | 3 | 1 | 3 | 1 | 0 | 0 | 3 | 2 | 1 | 0 |

| Species | Glycosyltransferase Family (GTs) |    |    |    |    |    |    |    |    |    |    |    |    |    |    |    |    |                  |       |
|---------|----------------------------------|----|----|----|----|----|----|----|----|----|----|----|----|----|----|----|----|------------------|-------|
|         | 35                               | 39 | 41 | 48 | 50 | 55 | 57 | 58 | 59 | 61 | 62 | 64 | 66 | 69 | 71 | 76 | 90 | No<br>classified | Total |
| FP      | 1                                | 3  | 1  | 1  | 1  | 0  | 2  | 1  | 1  | 0  | 3  | 2  | 1  | 3  | 3  | 1  | 5  | 0                | 89    |
| FG      | 1                                | 3  | 1  | 1  | 1  | 0  | 2  | 1  | 1  | 0  | 3  | 2  | 1  | 2  | 4  | 1  | 6  | 4                | 105   |
| FF      | 1                                | 3  | 1  | 1  | 1  | 0  | 2  | 1  | 1  | 0  | 3  | 2  | 1  | 3  | 3  | 1  | 6  | 2                | 108   |
| LM      | 1                                | 3  | 1  | 1  | 1  | 0  | 2  | 1  | 1  | 0  | 3  | 0  | 1  | 2  | 2  | 1  | 4  | 2                | 92    |
| MO      | 1                                | 3  | 1  | 1  | 1  | 1  | 2  | 1  | 1  | 3  | 3  | 0  | 1  | 4  | 4  | 1  | 6  | 2                | 101   |
| BC      | 1                                | 3  | 1  | 2  | 1  | 0  | 2  | 1  | 0  | 0  | 3  | 0  | 1  | 3  | 5  | 2  | 3  | 6                | 99    |
| SS      | 1                                | 3  | 1  | 1  | 1  | 0  | 2  | 1  | 1  | 0  | 3  | 0  | 1  | 2  | 2  | 1  | 3  | 4                | 93    |
| AN      | 1                                | 3  | 1  | 1  | 1  | 0  | 2  | 1  | 1  | 0  | 3  | 0  | 1  | 3  | 2  | 0  | 2  | 2                | 91    |
| NC      | 1                                | 3  | 1  | 1  | 1  | 1  | 2  | 1  | 1  | 0  | 3  | 0  | 1  | 2  | 1  | 1  | 3  | 4                | 74    |
| UB      | 0                                | 3  | 1  | 1  | 1  | 0  | 2  | 1  | 1  | 0  | 0  | 0  | 1  | 2  | 2  | 1  | 1  | 0                | 57    |
| MP      | 0                                | 3  | 1  | 1  | 1  | 1  | 2  | 1  | 0  | 0  | 0  | 0  | 1  | 1  | 2  | 1  | 2  | 3                | 57    |

| Species | Polysaccharide Lyase Family (PLs) |   |   |   |    |    |    |    |    |                  |       |
|---------|-----------------------------------|---|---|---|----|----|----|----|----|------------------|-------|
|         | 1                                 | 3 | 4 | 9 | 11 | 14 | 20 | 26 | 27 | No<br>classified | Total |
| FP      | 11                                | 7 | 3 | 2 | 0  | 0  | 0  | 0  | 0  | 0                | 23    |
| FG      | 9                                 | 7 | 3 | 1 | 0  | 0  | 1  | 1  | 0  | 0                | 22    |
| FF      | 11                                | 7 | 2 | 2 | 0  | 0  | 0  | 1  | 0  | 0                | 23    |

|    |   |   |   |   |   |   |   |   |   |   |           |
|----|---|---|---|---|---|---|---|---|---|---|-----------|
| LM | 9 | 6 | 4 | 1 | 0 | 0 | 0 | 1 | 0 | 0 | <b>21</b> |
| MO | 2 | 1 | 1 | 0 | 0 | 0 | 1 | 1 | 0 | 0 | <b>6</b>  |
| BC | 6 | 2 | 0 | 0 | 0 | 0 | 0 | 0 | 0 | 0 | <b>8</b>  |
| SS | 4 | 0 | 0 | 0 | 0 | 0 | 0 | 0 | 0 | 0 | <b>4</b>  |
| AN | 8 | 5 | 4 | 1 | 1 | 0 | 2 | 1 | 1 | 0 | <b>23</b> |
| NC | 1 | 1 | 1 | 0 | 0 | 0 | 1 | 0 | 0 | 0 | <b>4</b>  |
| UB | 1 | 0 | 0 | 0 | 0 | 1 | 0 | 0 | 0 | 1 | <b>3</b>  |
| MP | 1 | 0 | 0 | 0 | 0 | 1 | 0 | 0 | 0 | 1 | <b>3</b>  |

| Species | Carbohydrate Esterase Family (CEs) |   |   |   |    |   |   |    |    |    |               | Total     |
|---------|------------------------------------|---|---|---|----|---|---|----|----|----|---------------|-----------|
|         | 1                                  | 2 | 3 | 4 | 5  | 8 | 9 | 12 | 15 | 16 | No classified |           |
| FP      | 7                                  | 1 | 9 | 8 | 11 | 4 | 1 | 3  | 0  | 5  | 0             | <b>49</b> |
| FG      | 4                                  | 1 | 5 | 7 | 13 | 6 | 1 | 3  | 0  | 5  | 0             | <b>45</b> |
| FF      | 3                                  | 1 | 7 | 9 | 11 | 7 | 1 | 3  | 0  | 5  | 0             | <b>47</b> |
| LM      | 3                                  | 1 | 2 | 7 | 8  | 3 | 2 | 3  | 2  | 2  | 0             | <b>33</b> |
| MO      | 10                                 | 1 | 6 | 9 | 17 | 1 | 1 | 3  | 1  | 2  | 0             | <b>51</b> |
| BC      | 2                                  | 0 | 1 | 4 | 11 | 5 | 2 | 3  | 0  | 6  | 1             | <b>35</b> |
| SS      | 2                                  | 0 | 1 | 4 | 8  | 5 | 2 | 3  | 1  | 6  | 1             | <b>33</b> |
| AN      | 1                                  | 0 | 5 | 6 | 4  | 3 | 1 | 2  | 0  | 3  | 4             | <b>29</b> |
| NC      | 6                                  | 0 | 3 | 3 | 3  | 1 | 1 | 1  | 1  | 1  | 1             | <b>21</b> |
| UB      | 1                                  | 0 | 0 | 5 | 2  | 1 | 1 | 0  | 0  | 0  | 0             | <b>10</b> |
| MP      | 0                                  | 0 | 0 | 7 | 1  | 1 | 1 | 0  | 0  | 0  | 0             | <b>10</b> |

| Species | Auxiliary Activity Family (AAs) |   |    |   |   |   |   |   |    |    |    |    |    |       |
|---------|---------------------------------|---|----|---|---|---|---|---|----|----|----|----|----|-------|
|         | 1                               | 2 | 3  | 4 | 5 | 6 | 7 | 8 | 9  | 10 | 11 | 12 | 13 | Total |
| FP      | 14                              | 3 | 29 | 0 | 5 | 2 | 5 | 7 | 14 | 0  | 4  | 3  | 0  | 86    |
| FG      | 14                              | 1 | 20 | 0 | 5 | 1 | 4 | 4 | 13 | 0  | 4  | 2  | 1  | 69    |
| FF      | 12                              | 0 | 24 | 0 | 4 | 2 | 4 | 3 | 13 | 0  | 4  | 1  | 1  | 68    |
| LM      | 2                               | 0 | 4  | 0 | 2 | 0 | 1 | 3 | 20 | 0  | 3  | 3  | 1  | 39    |
| MO      | 15                              | 3 | 22 | 0 | 4 | 1 | 3 | 7 | 24 | 0  | 7  | 5  | 1  | 92    |
| BC      | 1                               | 0 | 6  | 0 | 3 | 1 | 1 | 3 | 9  | 0  | 2  | 0  | 1  | 27    |
| SS      | 8                               | 0 | 23 | 0 | 5 | 1 | 1 | 2 | 9  | 0  | 2  | 1  | 1  | 53    |
| AN      | 2                               | 0 | 16 | 0 | 0 | 0 | 0 | 2 | 9  | 0  | 2  | 0  | 2  | 33    |
| NC      | 8                               | 0 | 2  | 0 | 1 | 0 | 0 | 2 | 14 | 0  | 4  | 3  | 1  | 35    |
| UB      | 5                               | 0 | 7  | 0 | 2 | 1 | 2 | 0 | 0  | 1  | 0  | 0  | 0  | 18    |
| MP      | 5                               | 0 | 8  | 0 | 3 | 1 | 2 | 0 | 0  | 1  | 0  | 0  | 0  | 20    |

| Species | Carbohydrate-Binding Module Family (CBMs) |   |   |   |    |    |    |    |    |    |    |    |    |    |    |    |    |    |    |    |                  |       |
|---------|-------------------------------------------|---|---|---|----|----|----|----|----|----|----|----|----|----|----|----|----|----|----|----|------------------|-------|
|         | 1                                         | 2 | 5 | 6 | 13 | 14 | 18 | 20 | 21 | 24 | 32 | 35 | 38 | 42 | 43 | 48 | 50 | 52 | 63 | 66 | No<br>classified | Total |
| FP      | 14                                        | 1 | 2 | 1 | 12 | 0  | 11 | 5  | 1  | 1  | 3  | 4  | 1  | 1  | 1  | 3  | 2  | 0  | 4  | 0  | 0                | 67    |
| FG      | 13                                        | 0 | 0 | 1 | 2  | 0  | 34 | 2  | 2  | 0  | 3  | 3  | 0  | 1  | 1  | 3  | 19 | 0  | 3  | 0  | 0                | 87    |
| FF      | 12                                        | 0 | 0 | 1 | 1  | 0  | 22 | 2  | 2  | 2  | 3  | 3  | 1  | 2  | 1  | 3  | 21 | 0  | 3  | 0  | 0                | 79    |
| LM      | 5                                         | 0 | 0 | 0 | 0  | 0  | 30 | 3  | 1  | 0  | 1  | 4  | 0  | 0  | 2  | 2  | 5  | 0  | 1  | 0  | 1                | 55    |
| MO      | 28                                        | 0 | 0 | 2 | 0  | 0  | 53 | 3  | 1  | 0  | 0  | 3  | 0  | 2  | 2  | 3  | 14 | 1  | 1  | 1  | 0                | 114   |
| BC      | 17                                        | 0 | 0 | 0 | 1  | 0  | 17 | 3  | 1  | 17 | 2  | 3  | 0  | 1  | 1  | 3  | 1  | 0  | 1  | 0  | 0                | 68    |
| SS      | 24                                        | 0 | 0 | 0 | 1  | 0  | 28 | 3  | 1  | 17 | 2  | 2  | 0  | 1  | 1  | 3  | 10 | 0  | 1  | 0  | 0                | 94    |
| AN      | 7                                         | 0 | 0 | 1 | 0  | 1  | 17 | 4  | 1  | 2  | 0  | 3  | 0  | 1  | 1  | 1  | 4  | 0  | 1  | 0  | 0                | 44    |
| NC      | 19                                        | 0 | 0 | 0 | 2  | 0  | 3  | 2  | 1  | 8  | 1  | 0  | 1  | 0  | 1  | 1  | 2  | 1  | 0  | 0  | 0                | 42    |

|    |   |   |   |   |   |   |   |   |   |   |   |   |   |   |   |   |   |   |   |   |   |   |
|----|---|---|---|---|---|---|---|---|---|---|---|---|---|---|---|---|---|---|---|---|---|---|
| UB | 0 | 0 | 0 | 0 | 0 | 0 | 1 | 0 | 1 | 0 | 0 | 1 | 0 | 0 | 1 | 2 | 0 | 0 | 0 | 0 | 0 | 6 |
| MP | 0 | 0 | 0 | 0 | 0 | 0 | 1 | 0 | 1 | 0 | 0 | 1 | 0 | 0 | 1 | 2 | 0 | 0 | 0 | 0 | 0 | 6 |

Note: The enzyme classes were predicted by the CAZyme database (<http://www.cazy.org/>). Organisms, FP, *Fusarium proliferatum*; FG, *Fusarium graminearum*; FF, *Fusarium fujikuroi*; LM, *Leptosphaeria maculans*; MO, *Magnaporthe oryzae*; BC, *Botrytis cinerea*; SS, *Sclerotinia sclerotiorum*; AN, *Aspergillus nidulans*; NC, *Neurospora crassa*; UB, *Ustilago bromivora*; MP, *Melanopsichium pennsylvanicum*.

**Table S6** The protein-encoding genes and genomes of species used in this study

| Species                              | Genome size (Mb) | No. of genes | NCBI accessions      | BioProject  | BioSample      |
|--------------------------------------|------------------|--------------|----------------------|-------------|----------------|
| <i>Aspergillus nidulans</i>          | 30.05            | 10,045       | AACD000000000        | PRJNA130    | SAMN02953587   |
| <i>Aspergillus niger</i>             | 34.85            | 10,947       | ACJE000000000        | PRJNA15785  | SAMN02953752   |
| <i>Botrytis cinerea</i>              | 42.63            | 13,703       | AAID000000000        | PRJNA15632  | SAMN02953628   |
| <i>Fusarium circinatum</i>           | 43.95            | 15,022       | AYJV000000000        | PRJNA41113  | SAMN02371877   |
| <i>Fusarium fujikuroi</i>            | 43.83            | 14,810       | HF679023 to HF679034 | PRJNA322155 | SAMEA3724789   |
| <i>Fusarium graminearum</i>          | 36.45            | 13,826       | AACM000000000        | PRJNA13839  | SAMN02953593   |
| <i>Fusarium oxysporum</i>            | 61.38            | 17,458       | AAXH000000000        | PRJNA18813  | SAMN02953675   |
| <i>Fusarium solani</i>               | 45.81            | 15,702       | NGZQ000000000        | PRJNA368786 | SAMN06272960   |
| <i>Fusarium verticillioides</i>      | 41.84            | 14,180       | AAIM000000000        | PRJNA15553  | SAMN02953630   |
| <i>Leptosphaeria maculans</i>        | 45.12            | 12,469       | UNSE010000000        | PRJEB24468  | SAMEA104483101 |
| <i>Magnaporthe oryzae</i>            | 40.97            | 13,184       | AACU000000000        | PRJNA13840  | SAMN02953596   |
| <i>Melanopsichium pennsylvanicum</i> | 19.15            | 6,280        | HG529494 to HG529928 | PRJEB4565   | SAMEA2178376   |
| <i>Neurospora crassa</i>             | 39.23            | 9,841        | AABX000000000        | PRJNA13841  | SAMN02953583   |
| <i>Rhizoctonia solani</i> AG-I IA    | 36.93            | 10,593       | AFRT000000000        | PRJNA51401  | SAMN02981347   |
| <i>Saccharomyces cerevisiae</i>      | 38.1             | 5,645        | AMQD000000000        | PRJNA174690 | SAMN02769632   |
| <i>Sclerotinia sclerotiorum</i>      | 38.45            | 14,714       | AAGT000000000        | PRJNA15530  | SAMN02953621   |
| <i>Ustilaginoidea virens</i>         | 38.96            | 8,426        | PGGP000000000        | PRJNA414696 | SAMN07807409   |
| <i>Ustilago bromivora</i>            | 20.77            | 7,408        | FMVU000000000        | PRJEB7751   | SAMEA4497028   |

**Additional File S1.** Sanger sequencing results of structural variants (SVs) based on PCR validation for *F. proliferatum* and *F. fujikuroi*

This Additional file 1 contained Sanger sequencing results of structural variants (SVs) based on PCR validation for *F. proliferatum* and *F. fujikuroi*. Results were presented in FASTA format where the read ID corresponded to SV ID in table S3. **A** indicated sequences in *F. proliferatum* strain Fp9. **B** indicated sequences in *F. fujikuroi* strain IMI 58289. The terminal regions in light gray background are primer sequences.

>1-A

**AGGGGACAAGAGGTAAG**GCGCCGCGCTGACAGCTTCTTGGTCCCTTCAGGGTGACGATGATATCAAAAATCGAGAATAGAGGTTGTCTACGTAGGCTATCCCTGCTTC  
GCCTCCCCTGTCAAGCTGGCTACCAGCCCCTGACGGTGCTCCATACCCAGCGACTTCCCCAAAGGATGGGCCCCGCTCGGTGCTCCGCTCATCGTCCGAGCCGGCCCC  
GTGTTGAGACGCTCTGGTGGTTGTGAGGTGGTTCCTTCTTGCGGGGAAAACCTACCCAATTAACAAAATTTGAAGCCGGGGAACTTAATGGGGCCATCTCAGTATGGTAT  
CAAGGTTGAAGTAGTAACAAGTGGTTCATAATTGAAATTGAGCATGCCAAGATCAATCCAAAGGTCTCGCGATCT**CTGCACAGATAGCCTGA**

> 1-B

**AGGGGACAAGAGGTAAG**GCGCTGCGCTGACAGCTTCTTGGTCCCTTCAGGGTGATGATATCAAAAATCGAGAATAGAGGTTGTCTACGTAGGCTATCCCTGCTTCGCC  
TCCCCTGTCAAGCTGGCTACCAGCCCCTGACGGTGCTCCATCGCCAGCGACTTCCCCAAAGGATGGGCCCCGCTCGGTGCTCCGCTCATCGTCCGAGCCGGCCCGGTG  
TTGAGACGCTCTGGTGGTTGTGAGGTGGTTTCTAAAGGTCCGAGCCACAAAACCCCCTCAATCTGAATGCAATGAGGACCTGTCTTTGTTCCATGAAGCGGTTTGCGTT  
TCCTTCTTGCGGGGAAAACCTACCCAATTAACACAATTTGAAGCCGGGGAACTTAATGGGGCCATCGCAGTATGGTATAAAGGTTGAAATTGTCAACAAGTGGTTCATA  
GTTGAAATTGAGCATGCCAAGATCAATCCAAAGTCTCACGATCT**CTGCACAGATAGCCTGA**

> 2-A

**TAACCTCTCCTATCTCT**CAGCCGCGATGCGGAGACACCTCACCCCATTCCTGATCTGGAAAGACTTCCAATATTGGGCGTAACTGGATCTGGTCTCGCAGATTCAACA  
TGTTATACTATATATCTGCCGAGATCAGGCTTCCTTTGGAGTGACAGCATGATCTGGCAGCAGAGTCGACCTGATCAGATATCTAACTCCGTGAAAGACCATGTTGACGA  
AAACGGAGAACATTGGTCTGTTGAGGGTTCTCGCCGTGTGTTTTCCAGGACAGTTTTCTGGCACGACATCCGTGGGAAGTTCAGAAATATCCCCGCCCTAAGCATACA  
GCACAATGGAATAAACGGGTTCTCTCGGGCGATACTGTCCGCCTATATGACCCTATGACTAGCCAATATCTTTGCGCAATACCTGGTGAGCGAGTAGTCAGTGAAGCGG  
GTTATTTCCGCACGAAAAGTAGCACTGAGCAGGACCTTGATAGAATTCGAATAGGGTAAGCATATACAACCTGTTAACAGGATTCGTGCTGACGTACTATCCAAGAAGTG  
TCTTAAATACTGGCTCTGCGAGCTGTGACTGGAAAGTGATTATGAT**GTTGTTCAAGGGAGCGT**

> 2-B

**TAACCTCTCCTATCTCT**CAGCCGCGATGCGGAGACACCTCACCCCATTCCTGATCTGGAAAGACTTCCAATATTAGGCGTAACTGGATCTGGTCTCGCAGATTCAACA  
TGTTATACTATATATCTGCCGAGATCAGGCTTCCTTTGGAGTGACAGCATGATCTGGCAGCAGAGTCGACCTGATCAGGTATCTAACTCCGTGAAAGACCATGTTGACGA  
AAACGGAGAACATTGGTCTGTTGAGGGTTCTCTCGGGCGATACTGTCCGCCTATATGACCCTATGGCTAGCCAATATCTTTGCGCAATACCTGGTGAGCGAGTCGTCAGT  
GAAGCGGGTTATTTCCGGCACGAAAAGTAGCACTGAGCAGGACCTTGACAGAATTCTGAATAGGGTAAGCATATACAACCTGTTAACAGGATTCGTGCTGACGTACTATCC  
AAGAACTGTCTTAAATACTGGCTCTGCGAGCTGTGACTGGAAAGTGTATTATGAT**GTTGTTCAAGGGAGCGT**

> 3-A

**ACTCAGTCTGTCCGTTG**ACGGTAACTGGGGGATCTGTTGCAACCCGAACCTCTTATTTCGCATGGGTTACTGAAAAATCCTTGCGGATACGAATATTCCGAGGATCAGGT  
GTCTGAAGGCCGTGAGAGTCGTTTGGTGAAGGGCTTCCCTCATCTTGTTTCTGGTAAGTTGTCCTAGGGCTCGAGACCGCTTTGTTCTGTAGTGGCGAAGGCTTTGAGTG  
CGGCTTGCGGAGACTATTGAACGTGAGGTGCGAAGATTGGCTCCATCAACTTTAACGGGGAAACGCCTGGCACGGATTGGCTTTGAAGAGTGCTGGCGCGTTTCGAA  
CTGTTGATTTGAACCCTGCGGAATCGGTAGCTCAGACCGGCTGGCAGTAGATGTGGCCTCCTGTTTCAAAAATTGCTTTATCTGAGCCGTGACAGCCATATCAGTGCTTC  
CGTTGTCCCGTGCAGTGTGGAAGCATCTTCAAGGTAAGTGTGCTTCGACAATACGACTCAGCATCAGAGTCAACGGGTTGCCGTGATCTTGAGGGCGAGGAGTGCAG  
TCATCTCGGAGATGCATAATGGCAGATGCTGAATCTTATTCTTTTGGATTCCCAGGACCTTGAGAGACGCCATCTTTGCTATGTCATCTGGGAGGCATTCAATCTTGTTTCT  
ACTTAGATCGAGGATCTCGAGACGACTTAACTCCAAGAGCTGCCTTGTAGTTAGCCTTCAGCGGCATGCATATCACGGCTTGAGGGAATATGTACCACAGGAGGAAAA  
GTGTGGATGCAATTGCTCCGGATGTTAAGGTAGCGCAAGGAAGTAAATAGAGACAGATGTGGCGGGATGTTTGAAAGATGGTTGTGAGATAAAGCTAGCCTATTGGTG  
AGCTAGGTTAGCAGTTGGATATAAGCCTGAATTATGGAAGTACAGACCGCTCAACGTTCCGATTGAGGTTATCGAGAGTATTAGCGGATGAGTCTGAGAGACCACTGTG  
GCTAAGGTCGATGGTGACGCCTTGGTCAACAAATAGCCCAGACATGGCCATCACTACTATTCAATACTCCCGTCGACAGTCGCTTCAAGCCTTCTTGTAGCTGCGCCGG  
ATCGGGAGATAACCACTATGGTGGGTGATGAAGATGTCTGGCCGCTGTAAGTTTAAAGATTAATGCTCTGTTCCCTGGTGTCTAAGTGAAGATATTATTCTTTAATGGAGGTG  
ACACTAGATCTGGTGGGGCTGTGGTGTGATGTTGTAAATTGACAGATTCCGGTCGTGGCAGGGCGGGGACATTCATTGGAAACGCGGAGTCACATGTTGGCTTAGGTAA  
GATGCTTTTCGTAGGCCAACATCATAATCATAACTTATTCCGCATTTCCCTCATCAATCA**TAGAGGAAAACAGGACC**

> 3-B

**ACTCAGTCTGTCCGTTG**ACGGTAACTGGGGGATCTGTTGCAACCCGAATCTTATTTCGCATGGGTTACTGAAAAGTCCTTGCGGATACGAATAGTCCGAGTATCAGGT  
GTCTGAAGGCCGTGAGAGTTGTTTGGTGAAGGGCTTCCCTCATCTTGTTCTCTGGTAAGTTGTCCTAGGGCTCGAGACCGCTTTGTTCTGTAGTGGCGAAGCCTTTGAGTG

CGGCTTGGGCATCACTATTGAACGTGTAAGTTTAAAGATTAATGCTCTGTTCTGGCGTCTGAGTGAAGATATTATTCTTTAATGGAGTTGACAGTAGATCTGGTGGGGCT  
GTGGTGTTGATGTTGTAAATCGACAGATTCGGTCGTGGCAGGGCGAGGACACTCATTGGAAACGCGGAGTCACATGTTGGCTTAGGTAAGGTGCTTTCGTAGGCCAAC  
ATCAAACTCATAACTTATCCGCATTCCTCATCAATCA**TAGAGGAAAACAGGACC**

>4-A

**CGGATAGTCGTCTTCAT**GGGAGTAGATTGAACCGATGTTGTTTCCCGTCGATCACTGGGAGGGTTAAATGCCAGTTTTGATGGGCAAGATGCTCTTCTTTGGGGTATGCT  
TGGATAGGCAGGGCTTCCAGTCAATTTGCCAACTTGTCCCATGAGCTTTGAGGAATGAATCTCTTCTTGATTGAAGTTCTGAGAAGATACTCAGCATGAGAAGGTGTTG  
TGGGCGTCGTATCAGCCTCGCGACGACGTCCTACCAAGGTTTGTGGCGTCCTATTATTGAGTGTTGTTGGGGATACGACTTCAGTGGCTTTCGCTTTGCCAACCTCTTCCT  
CTTCGTCGCTAGATTCATCCACGGAGGCAGTGACACAGCCTCCGTGGTTTTTCAGTTACAGCTAGGCTGCTGGTGACATCGGCTGTCGCAGTCACACCCATGTCCTCATCT  
TCTGACCCTGTGGCTGATTGACATTCGCTGACCGAATCAGATGGCGTGGTGTCAATCATCGAAGAAGGTGGCAGTCAGAAATCTCGAATCCACGAAACTCCTTGCTTG  
AGATAGATGACAGAGGACTTGTACAGCGATTGGTCAATTTCCATTGCTGATTGAGACTCTCGTAGGCTGCGCCCCCTCCTCTACTGGTGTGCTGGCCATATCATCGTTG  
GGCGACGACAGGCCAGACCAAGTGTCTCGTCTCTGGATATGGACACATCTTGGTCTGATGCAGTCTCAACAGCTTGATTGAGCGTTGGCCGCATTTTAAACAGAAA  
CTGTCATCTTCTTGGGTCTCAAAAGCGGAGCGAGGATTCTGACAACTTCATCTT**GGGCTCTCAAATCAGTT**

>4-B

**CGGATAGTCGTCTTCAT**GGGAGTAGATTGAACCGATGTTGTTTCCCGTCGATCACTGGGAGAGTTAAATGCCAGTTTCGATGGGCAAGATGCTCTTCTTTGGGGTATGCT  
TTGATAGGCAGGGCTTCCAGTCAATTTGCCAACTTTCCCATGAGCTTTGAGGAATGAATCTCTTCTTGATTGAAGTTCTGAGAAGATACTCAGCATGAGAAGGTGTTG  
TGGATTTTGATGGCGTCGTATCAGCCTCGCGACGACGTCCTGCTAAGGTTTGTGGCGTCCTATTATTGAGTGTTGTTGGGGATACGACTTCAGTGGCTTTCGCTTTGCTGG  
TGACATCCGTTGTCCCAACCATATCTTCATCTTCTGACTCTGTGGCCGATTGGCATTGCTGGGCATTTCTTCAGTGACGAGCACTATTGCGTCTTCCGCTGACACTTGAC  
TAGGACAACTTGTGAGTTCTGAAGCAGATGGCGTGGTGTCAATCATCGAAGAAGCACTGGCGCTATCTGGTCGGATGTGATCGGAGGCAGTGACAATGCTCTCGTGAT  
TTTCAGTTACAGCCAGGCTGCTGGCGACATCGGCTGTCACAGTCACACCCATGTCCTCATCTTCTGACCCTGTGGCTGATTGACATTGCTGATCGAATCAGATGGCGTG  
GTGTCAATCATCGAAGAAGGTGGCTGTCAGAAATCTCGAATCCACGAAACTCCTTGCTTGAGATAGATGACAGAGGACTTGTCAACGATTTGATCAATTTCCATTG  
CTGAGTCTCGTAGGCTGCGCCCCCTCCTCTACTGGTGTGCTGGCCATATCATCGTTGGGCGATGACAGGCCAGACCAAGTGTCTCGTCTCTAGATATGGACATATCTTGG  
TCTGATGCAGTCTTAACAGCTTGATTGAGCTTTGGCCGCATTTTAAACAGAAACTGTCATCTTCTTGGGTCTCAAAAGCTGGGCGAGAATTCCTGAAAACCTTCATCTT**G**  
**GGCTCTCAAATCAGTT**



> 5-A

**ATGACAACCATGAATCA**GGAGTTAGTGAGCCTTGTGCCGCCAGTACTGGTTGAGCTCCATAGCTTCATAGCTCCACTAGCCAAGCAGTCAGATAGTAGCCAGATAACC  
GCTGAACCATGCCAGACCGCACAGACGATGTGTTTCAGTTCTGAGACTACACCCTGATGTGTGCAATCGCCTGCAAACATGTCACTTTCACATAAGTAACTCGATTGGA  
TCGATACGTACGAACTTTGGTTCCGGCTGCATATTATTGCAAGGTGCTATGCCCCGGGAATCTGGGAATAGATCTGACTTATTATAGTGGTATTTTGTACATTAGAATCAACT  
CAACGTGTCTGAGATTGAGGTTGAGATTGAGGCGAATTTTCTGGGCCTCATCTACGAATACCTGACCGGCCTTACTATAACAAGGCACGCCGATCTAGGTGCGGGGGTAG  
CACATGGCATCGCGGATAACACAAGGCACAGATGACCGAATATCGACCGGCTTGTGTTGTGCATAACATCTTCCGGAAGTACCAAGCTTTTCTCAGCAGACCAGCGCCG  
AGAAAAGCTTGGTCCAGACGGGCATATCGGTCAGCAAAGCGCCGGGAAATGGCTCACTCAGTCGTTGGTCACTGAACATATAGTGCGCTTACCGAACCGACCAAGCC  
TTGAGGGCATATGCTCTATAGTCATGCTCATGCCTGGCATAGCTGAGAGCATTGCGCG**CACAGGGTCTTCTTGTT**

> 5-B

**ATGACAACCATGAATCA**GGAGTTAGTGAGCCTTGTGCCGTCCAGTACTGGTTGAGCTCCATAGCTTCATAGCTCCACTAGCCAAGCAGTCAGATAGTAGCCAGATAACC  
GCTGAACCATGCCAGACCGCACAGACGATGTGTTTCAGTTCTGAGACTAAACCCTGATGTGTGCAATCGCCTGCAAACATGTCACTTTCACATAAGTAACTCGATTGGA  
TCGATACGTACGAACTTTGGTTCCGGCTGCATATTATTGCAAGGTGCTATGCCCCGGGAATCTGGGAATAGATCTGGCTTATTATAGTGGTATTTTGTACATTACGGAGGTC  
CCTGCCAAAAGTTTGGTCTCGACCCCTGCTCATAAAATAGAGGATTAGGCGATTACAGCTAATAAGGTACTTCAGTACTTTAGTCTTATCTTATTAGGATTAGAAGCTCT  
ATAACCTTTCCCCTAAAGTCTACTATAATTATAATTATAGCGCTTACTTTACTATCAATAAGAGACCTCTTGACCTTCTGGGTATCGATAGGGGCATTCCCTGCTAGCTTCA  
TTTGGCTAATAGGGGGTCAGGATAAACTTTTGGCAGGGACCTCCGTAGAATCAACTCAACGTGTTTGAGATTGAGGTTGAGATTGCGCGAATTTTCTGGGCCTCATCTA  
CGAATACCTGACCGGCCTTACTACAACAAGGCACGCCGATCTAGGTGCGGGGGTAGCACATGGCATCGCGGATAACACAAGGCACAGATGACCGAATATCGACCGGC  
TTGTTTGTGCATAACATCTTCCGGAAGTACCAAGCTTTTCTCAGCAGACCAGCGCCGAGGAAAGCTTGGTCCAGACGGGCATATCGGTCAGCAAAGCGCCGGGAAATG  
GCTCACTCAGTCGTTGGTCACTGAACATATAGTGCGCTTACTGAACCAACCAAGCTTTGAGGGCATATGCTCTATAGTCATGCTCATGCCTGGCATAGCTGAGAGCATT  
GGCG**CACAGGGTCTTCTTGTT**

> 6-A

**ATTATGTGATGCCGCC**GGCATCTGCATGGCGCAGGCGTGGGACCAGTTCAAATACCGCGGCGACGGCGGTAAATCATCAACCTGCTGGTGCTGATCAACTTCCGAGC  
AAGAGAATGGGTGCTCATCAACACTTTTATCGACATTGTAGCCATATAATGCTTGCAAATAGAGAGCAATTGCCCTGCAGTCACAGGGTATCACATTGAAGGGGAAAG  
AAGCAGGGGTTGTGTTAAAATCCATCATCTGCCTTAAGCAATACGAAGAGGAGTGAAGGCTTACAAAACCTGCCGGAACCTCGCTCTTAGCGCGGCAACG  
CACTGTCTGTTCCCTGTCATCCTAAATGGATCTCTGCTTTGGCGTGACATGGCAGCTGGGTTGCTGCTGATCGTTTGATCCCGATGAGATGAGCAATCGGCCGAGTCGAG

CTCACAGACATTTGCCCCTGACACTTGTGGGGAGCGGAAAACATCAAGCAGAGCAGAGCCTGAGAAGATCTAGGTAGAGCTCACGCCCTCTACCCCTGTAAACGAAC  
TTGTGCTAGGTGTGGCGAGTCATGAACTCACACCATTTCTTCAAGTTCATAATGTTGATATCCCCACTAAAGCTTCGTTTCTTTGACGATGTGTATACTTGTTCGAGATCTA  
GGGTGGTTTCAGTGGTTCGCAGCTCCTCAGACCGGAACGTCCAGTGTTCGTTGTGATCTGCCAAGTGCCTTGAGTTCCTCGACTTCATAATCACATGTTCAAAACAA  
GGACGAACGGAAACAATTAAGTTTGCCAACGGCATAACAGTAGTGTGAACAGTAAACTCAGTTGAAGATTGCTTCTGCCGTTGCTACTGTGGTTGGGTAAAGGCTGG  
CAGACATCCTGCAGGGGACTCAAACATGTACAGATACAGAGAATGATTCAGGTTTCAGGATGTCATTTCCCTGGCACGTTGGCGGGTACTGTACCAGGGAATATTCAGTC  
ACGTCATTAAATTACTTGTGCAACTACCCTAAAGAACAATTTCTATCCTGCCGTGAATCAGTATTCAGCAAGTCCCTCATGACCAACCGGCATCGATGAGTTGGCACGGA  
TGTGGCCCATGACGGACGGAAAGAGACGTCAGTTGTTATAAAGAAGCAATGCAGCGGCACATGGAAAAGCAAGTTTTAACAAGTTCCTCAGCATAACTAGTCGCCGAG  
TCCCTTGACAGTGAGGCATATCAAAATGAGGGGGTTTTGGGCGGCACAACTATCATCAGAACTGGGGTATTCAACTACCAATTTGCACGACGATCAATTGATCGAGAATC  
TTGGCCCAAGGCTCGACCTGCTCACTGCTTTTTGTATATTGTTGCCTGAACAGGCCTTGCTCCCAGGTGTCAATTCGAATCCCCACACAATACTGATATAAGCAGGGTTG  
CGGATTTGCAGCCCCAGCCCCAGCCCAGCCTCGCTCAGTTCAACTCGGCCTATCGCTTGACTCTTGATGAATGACTGGGCTTCGAACTTGGCAGAATGGAGTATGCTCA  
CAGTCTTTCAACGACATGACTCGATAAAAACAATTGCGTGCCGTTCCACGAGTCCACAGTTGTTGCGCCTGGCCATTATTGTTCTTCTTACGGACTCACTCCTTGTTCCC  
GCCGAAATGTGATATATGACAGAACGCTAGCTGTCTAGGGACCCCCGGATCTCAGCAACATATCACAAAACATCACTCCGACATGGGTAGCTTAATACGAGAATCTCA  
GAACGTACAGTATGTGAACAGAAACAATGGGCGACAGGGGAAAAGCCAACGTCTATCTTGTCTGGTTCGATGGATTAACACTTAACGGGGGTTTTAGGCGTCTTTTCCC  
GCCCTTTACTACACGCCCCGCCATCCTCTCAGGGTTGCAGGAATCCCCCTCAACGTGCATAAAATCCTGGACGCGGATCTTCTCAGTTGGAGAAGCCCATACTCTGCGTTA  
CATCGTAGGGGGGCTAAGCGGCTCGGAGTTAGCTTTTGCCATGGTAGCTATACCGCTGCCACCATGATGCCCTGTTCTATCTGCTCTACGACGTCTCGTTCGCCTCACCA  
TCTTCACATCCCCTGAATAACAGTCGGTATATGGTCAACCATATTGGTGCCTGGATGCCTCTATATTGACTATATTGAGCGTAAATTATTCTCTGCGAACTAGGGATTTCCT  
TGTCTATCAGTTCTCCTTGTTTACATATACCCAGGCCTATGCGGAACCGCAATATTAAATTCGCTAAACAAATTGTTGGAGCTGCCTTCGTCCTGACTAGGAAATGGA  
AACGAATCGGTGAGCTCTCCCTTGATTCCCTCATGATCCCTCACTGCCTTATCCTTCGTGCGCTTCCCAAGGGTGTTGGTTGATCAGGTGTGAGAGACTTGTGTCTTCTCAA  
CTGACGCGTGGTGACCTGAAT**CAAGCATGAGTTGTGAT**

> 6-B

**ATTATGTGATGCCGCC**GGCATCTGCATGGCGCAGGCGTGGGACCAGTTCAAATACCGCGGCGACGGCGGTAAATCATCAACCTGCTGGTGCTGATCAACTTCCGAGC  
AAGAGAATGGGTGCTCATCAACACTTTTATCGACATTGTAGCCATATAATGCTTGCAAATAGAGAGCAATTGCCCTGCAGTCACAGGGTATCACATTGAAAGGGAAAGG  
AAGCAGGGGTTGTGTTAAAATCCATCATCTGCCTCAAGCAATACGAAGAGGAGTGAAGGCTTACAAAACCTTCCAACCTGCGGCAACCTCGCTCTTAGCGCGGCAACG  
CACTGTCTGTTCCCTGTCATCTAAATGGATCTCTGCTTTGGCGTGACATGGCAGCTGGGTGTGCTGATCGTTTGATCCCGATGAGATGAGCAATCGGCCGAGTCGAG  
CTCACAGACATTTGCCCCTGACACTTGTGGGGAGCCCATACTCTGCGTTACATCGTAGGGGGGCTAAGCGGCTCGGAGTTAGCCTTTGCCATGGTAGCTATACCGCTGC

CTACCATGACGCCCTGTTCTATCTGCTCTACGACGTCTCGTTTCGCCCTCGCCATCTTCACATCCCCTGAATAACAGTCGGTATATGGTCAACCATATTGGTGCCTGGATGCC  
TCTGTATTGACTATATTGAGCGTAAATTATTATCTGCGAACTAGGGATTTCTTGTCTATCAGGTCTCCTTGGTTTACATATACCCAGTCCTATGCGGAACCGCAATATTAA  
TTCGCTAAATCAAATTGTTGGAGCTGCCTTCGTCTGACTAGGAAATGGAAACGAATCGGTGAGCTCTCCCTTGATTCTCATGATCCCTCACTGCCTTATCCTTCGTGCG  
CTTCCCAAGGGTGTGGTTAATCAGGTGTGAGAGACTTGTGTCTTCTCAACTGACCGCGTGGTTACCTGAA**TCAAGCATGAGTTGTCGAT**

>7-A

**GCCTCGGGATATGGAGG**TCTCTATGCCGAGCGGGGCTTCGTTTCGTGGGTGAGGCCTTGGCCAACTCTTGGTGAGACTATCGTCAATGTCGTCACTTTTGCCAACTCGT  
GCAATGCCTACATTCCGATACAGGAGAAAGAGGCAGCTTGTGCGATTGTCTAGTCACGAGATCCGATTCAATGCTTTTCTTGACGACTATTCTTTGAATCAACTAAACCCA  
TGCGCCTCAAGCCAACATTGGTCCAGAATATGCCAACATACCTATCGATCGATGTCTTTAGACCAACAACCTCCTCAATTTTGCCAAGCCTTACAATTGTCCCCTGCTTTAC  
CCAGTGACATACAGAATCGAGACCCTTGCAGGGATATTCTGACGGGCAGTTATCTCAACACCAACTAGAGTCAAAAAGTCCTCCTATACCTTCCCGATTGGGATGTCCA  
GCTATTGACACGATGAAGGACTTTAGGCGCGGTCTGAGGTGACTCTCGAAAGAGCGATCGATTGGTAGTACGAGCTATGATATTCTGTAATCAAGATAACAAGACGGTT  
ATGTGAGGATATCCCTGGGATCTAGTTAAAGACCTCGGATTATTATTGGTCACGGTTCCTGACCAAAGGCTTGGTGGTGAATCAGATATCTCTCGCAGATGTGGCCATG  
GTGCAATTGAAAGTCTGAAACTAGATTCTAGATTCAGTGCTAATCAATACCAATACCAGAACCTAATGATTTTCTCATCTGTCCGACACCGAGGATTTCATAAACCCGTC  
GGCCTCCAAATCTCTAAAGCTCCGACACCAGCAACGCCACAACGCACAAGCCACCCG**CCTCATCCCTGTTCTCGA**

>7-B

**GCCTCGGGATATGGAGG**TCTCTATGCCGAGCGGGGCTTCGTTTCGTGGGTGAGGCCTTGGCCAACTCTTGGTGAGACTATCGTCAATGTCGTCACTTTTGCCAACTCGT  
GCAATGCCTACATTCCGATACAGGAGAAAGAGGCAGCTCGTTCGATCGTCTAGTCACGAGATCCGATTCAATGCTGTTCTTGACGACTATTCTTTGAATCAACTAAACCC  
ATACGCCTCAAGCCAACATTGGTCCAGAATATGCCAACATACCTATCGATCGATGTCTTTAGACCAACGACTCCTCAATTTTGCCAAGCCTTACAATTGTCCCCTGCTTTA  
TCCAGTGACATACAAAATCGAAACCCTTGCAGGGATATTCTGACGGGCAGTCTAGGGGAGGAAAGAAAACCTCTGGACCTTGATCCTAGATGGCAAAAAGACTTAGGT  
AAATTTGCATAAATTTAGGATATCTTTTGCTGGGTTTATTTTGACCCCTTATATCAAGGTCCAGTGTTTTCTTTCTCCCTGAGGGCAGTTATCTCAACACCAACTACTAAGA  
GTCAAAAAGTCTTCTATACCTTCCCGATTGGGAAGTCCAAACATTGACACGATGAAGGACTTTAGGCGAGGTCTGAGGTGACTCTCGAAAGAGCGATTGATTGGTAGT  
ACAAGCTATGATATTCTGTAATCAAGATAACAAGACGATTATGTGAGGATACCTATCCATGGGATCTACTTAAAGACCTCGGATTATTGGTCACGGTTCCTGACCAAAGG  
CTTGATGGTGAATCAGATATCTCTCGCAGATGTGGCCATGGTACAATTGAAAGTCTGAAACGAGAATCTATATTAGTGCTAATCAATACCAATACCAAAACCTAATGA  
TCTTCTCATCTGTCCGACACCGAGGAATTCAATAACTCGTCGGCCTCCAAATCTCTAAAGCTCCGAAACCAGCAACGCCACAGCGCACAAGCCACCCG**CCTCATCCCT**  
**GTTCTCGA**

> 8-A

**GTCTCCTCTTTCCTCAC**TTGAATCTTGCCGTCCCGTACCGTGCTGCTCATCTCCCTCTCATACTGTGACGAGCACTGACACCGCCAGAACAATATCCATTAAACACTGGC  
CCAGAGGAGGACCTAAAAGACCGCCAACCATCAACTAACTCTATATCTCTGGCTGGTTTCAAGTGTAACCTCTCCGCAAAGGCAGGCGACTTGCGTTGAAAATGTTTGT  
TTGTGCAATGCATATGCACATATATGCACATAGGCTGATGCAACTGATGCAACAGCAACACACTAACGTGGGTATGCCAGGGATACCCACGACTAATCTCCAGCCACG  
CATTCTCTGTCCTTGACTGTCAGTGGCCAACTGTACGATGTGTATGCCAACTCGACAATCCAAATGCTTGATCCAGCATCTCTGGAATACGACCTGATGCATCCATGTTT  
CAAGATTGGCTGCCAGTTGTAGGCAGCCTAGGGGAGGAAAGAAAACACAGGACCTTGGTCCTAAATGACAAAAAGACTTGGGGTAATATAGCCTAAGTTTAGGATGA  
CTTTTGCTAAGTTTATTTTGACACCCTACAGTAAGGTTTCGCTGTTTTCTTGCCCCGGAGGGCAGCCCTTCAAATGCTGTGCACCACACCACTTTCTCTTGTCGGGAGCAT  
CAACTGTCAGCGGCAATGGAATGCATACGTACGTACTCCAAATCCACGTTGTTAACCGCCAGCTAGGACTGGTTGTTTCAGTCGATTATTCCTCGGCTCACACAACCCAT  
CCATGTTTCAGTTATGGATACTTGATCGTTTAATACAACCTTGAGGGTCGCATTGCCCGGACATGGGCTCCGGCAGAGTCATGTTGCCTACCATCCTTGACATTTACAAGT  
CATGTCAACTCATCTCGGTACTTTATTTCGAAACTGCCTAGCTGTCAAAAACATCTGACATTTCGCAGGTAGCCACAATGCGCTGACCAACTGCATCACGGCATTTCGCTCC  
ATCACGAAGTCTATCAGAACAAAGAAACCCAACTCCCTGGCCACGGCGCTGCGGGTACCATTTTGCTGCATTCCGGTCTCCTCCAGAAATTCACCGTGCGTAA**AAAGG**  
**TTCTGTTGGTTC**

> 8-B

**GTCTCCTCTTTCCTCAC**TTGAATCTTGCCGTCCCGTACCGTGCTGCTCATCTCCCTCTCATACTGTGACGAGCACTGACACCGCCAGAACAATATCCATTAAACACTGGC  
CCAGAGGAGGACCTAAAAGACCGCCAACCATCAACTAACTCTATATCTCTGGCTGGTTTCAAGTATAACTCTTCCGCAAAGGCAGGCGACTTGCGTTGAAAATGTTTGT  
TTGTGCAATGCATATGCACATATGCACATAGGCTGATGCAACTGATGCAACAGCAACACACTAACGTGGGTATGCCAGGGATACCCACGACTAATCTCCAGCCACGCA  
TTCTCTGTCCTTGACTGTCAGTGGCCAACTGTACGATGTGCATGCCCAACTCGACAATCCAAATGCTTGGTCCAGCATATCTGGAATACGACCTGATGCATCTATGTTTCA  
AGATTGGCTGCCAGTTGTAGGCAGCCCTTCAAATGCTGTGCACCACACCACTTTCTCTTGTCGGGAGCATCAACTGTCAGCGGCAATGGAATACATACGTACGTACTCC  
AAATCCACGTTGTTAACCGCCAGCTAAGACTGGTTGTTTCAGTCGATTATTCCTCGGCTCACACAACCCATCCATGTTTCAGTTATGGATACTTGATCGTTTAATACAACCT  
CGAGGGTCGCATTGCCCGGACATGGGCTCCGGCAGAGTCATGTTGCCTACCATCCTTGACATTTACAAGTCATGTCAACTCATCTCGGTACTTTATTTCGAAACTGCCTA  
GCTGTCAAAAACATCAGACGTTTCGCAGGTAGCCACAATGCGCTGACCAACTGCATCACGGCATTTCGCTCCATCACGAAGTCTATCAGAACAAAGAAACCCAACTCCC  
TGGCCACGGCGCTGCGGGTACCATTTTGCTGCATTCCGGTCTCCTCCAGAAATTCACCGTGCGTAA**AAAGGTTCTGTTGGTTC**

> 9-A

**AGGTCGGTGTCGGTATC**GTGCGCTCTGGTGTCGCCAAGGCCAAGGCCGATCACATCCTGATCTCTGGTCACGATGGTGGTACTGGTGCCTCTCGATGGACTGGTATCA  
AGTATGCCGGTCTTCCTTGGGAGTTGGGTCTGGCTGAGACTCATCAGACTCTGGTTCTCAACGATCTTCGTGGTCGTGTCGTTGTCCAGACTGATGGTCAGCTCAAGACC  
GGTCGTGATGTTGCACTGGCTTGTCTGCTAGGTGCTGAGGAATGGGGCTTTGCCACCGCTCCTCTCATCGCTATGGGCTGTGTCTTCATGAGAAAGTGCCACTTGAACAC  
TTGCCCTGTTGGTATCGCTACGCAGGATCCTGAGCTTCGCAAGAAGTTCAGTGGAACTCCTGAGCACGTCATCAACTTCTTCTACTATGTTGCCAACGAGCTCCGGGGCTA  
TCATGGCCCAGCTTGGTTTCCGAACCATCAACGAGATGGTTGGCCACGTCGAAGTCCTCAAGATGCGTGATGACCTTCGAACCCACAAGACAGCCAACATTGACCTGT  
CTCTCCTCCT**GACACCCGCACACAAGC**

> 9-B

**AGGTCGGTGTCGGTATC**GTGCGCTCTGGTGTCGCCAAGGCCAAGGCCGATCACATCCTGATCTCTGGTCACGATGGTGGTACTGGTGCCTCTCGATGGACTGGTATCA  
AGTACGCCGGTCTTCCTTGGGAGTTGGGTCTGGCTGAGACTCATCAGACTCTGGTTCTCAACGATCTTCGTGGCCGTGTCGTTGTCCAGACTGATGGTCAGCTCAAGAC  
CGGTCGTGACGTTGCACTGGCTTGTCTGTTAGGTGCTGAGGAATGGGGCTTTGCCACCGCTCCTCTCATCGCTATGGGCTGTGTCTTTATGAGAAAGTGCCCTCGAAATTA  
GCACTATGGTTAGGACATCCCAAGGACCTAAGCCTATCTCTGCTATCAACATTGGGGACACACTATATGATCCCAATGATAACCCTGTCCTATGTCTTGCCGTGGCTCCTG  
TTCAACAAGGTCGTTTGAAGGAGATACGCTATAAAGAGTTCGATTCACGACGCAACGTGTCTTTCAAGTGACGCCTGATCACATATTGCCCCCTTCGAACCTATGGCAC  
CAGGCCTTCGGTCAGCAAGATCAGTGTGACTTGGTTCACGTATTGTGATAGACACTCCCTTGATCGCCAGGCGGACAATCTTCGCTTTGAAGATTTGGTTGACACTATCT  
ACAGAGACTTGATGGATAGTCATGAAGTTGAGATTCTTGACAAAGCCGCGGCCCATGGGTATATCGATACTATTCTAACACGACACTACCACCAAGGACAAGACGATC  
GTTACTCGAACAAGATCGTTGAAGTTCTTCTCGATTGGCCAACCATGAACTTGAAAACAATCCAGACCTGGTTCGTGAGGCTATGCACGATGCTGTAGATCTGTACTTT  
GAAAATCCTCCCAATCTCGTGACGATGCAGAGTACGATGATGATGCCCCTACCATCGATCTTGCCCTGACTTTGTGGCTCTTCGAGACGCTACCCTGGCAAGTACAA  
CTGCTGGCAGTACTTATCGCCGCACACCTTCGTTGAATCAGCCAGACTCACAGTCATCTCGCCAATCTCAGCAAACCCAGCGGGACTCTCAACAGTCTGGAGGCATAC  
CTCAAGGCTCTGGCGGTATATCTAGACAAGTATCGTTGAATACCCAAGCATCCAGCTCCTCGTTCTGTTGATTCTTCGGCCATAGCTCTATCTGAAGAGGCCATTCAACGA  
TTCAATCGGGTAAAGACATCTATCAACCGTAAGCCTTGTCCATGTGGTGGTATTCGCAAGATCTATCGCCAGTTTGCCTCTGAAGAAACAAGCCCAGCTTGTTTCAGTCTCT  
ACTACTCAGTCAACATGCTCATATGGTAGACCCATATGTTGTTTCGAGATGGAGATGAGATCAATGTTTCTGTCGAGACATTTGAGGGCTTCTGCAATAAAGAAGCTAAAC  
GGATGCACCTCAAGCTGCATCGTGCTCCATTGACCTTTGTCCCGGCTCCTAGTGGACAAGATCAAGCAACAGATGAAGCTCTACCAATCGACCCATACTTCCTTGGTTTA  
TGGCTTGGTGATGGTGGAGCTGAGGGTCTTTTATCTATGGCAGTGACCATGAGACTCGTGTGTTGGCTATCCAGCTATGTTGATCGTTTGAATAATGGCAGACCAGCTGGT  
ACTAGGCCATTGAAACTTAGAGAGTATCGAACGCAGCAAGCTAGTGAAGTCTCTGCGTAACTCTAACTATAGGGCTAGAGTTGATGTCTTCCGTTGGGCCATTACTTCAG  
AGTTACATGCACCTGGCCGGCCATGGAGTCCCATTGAGAAGGCTTACAAAACCTTGGGCTTCTCAACAACAAGAGCGCTGGTATCCCAGACTGCTACCTCCAGGCCA  
GCAAGCAAGCACGCCTGGCAGTCTTATAGACGCTGATGGTTGCTATGTCAAGTCTCATAATACCTACCGGTTTATCCAGCACGGTGCAGGACACAGGA

AGATCGTCGAAGATGCTAAGACTTTGGCTCTTAGCTGTGGCATTTCAGTGACAGGTGTTGACACGTGACACCTCTCAACCAGTGGAACAACAGGCATGGGCCAAGCG  
TCCAGTACGTGATCTATCTAGGTAAAGGTTCAAACGAGTTCAGAACACCTGTTGATCCCACGCAAGAGAATGAACCCAGCAAAGACATTCTATACGCACGATGCAC  
GACCTTTTACTGTCTCGGACGTGAGGATGGTCAGTACAGAGGAATCCAGGTTTCTGGAGGGCTATTCCAGCTCCAGAACCGCCTCGTTACTCACAATTGCCACCTGAA  
CACTTGCCCTGTTGGTATCGCTACCCAGGATCCTGAGCTTCGCAAGAAGTTCACCGGAACTCCCGAGCACGTCAATTTCTTCTACTATGTTGCCAACGAGCTCCGG  
GCTATCATGGCCCAGCTTGGTTTCCGAACCATCAACGAGATGGTTGGCCATGTCGAAGTCCTCAAGATGCGTGATGACCTTCGAACCCACAAGACAGCCAACATTGAC  
CTGTCTCTCCTCCT**GACACCCGCACACAAGC**

> 10-A

**GCTGCCCATCATAAGTG**GAAAGTTATCACGATTTCTGCCAATTGCTAATGCATAGTAGGTCATAGGGGAGCTTCCATGAGAATACTATATCCTGTAGGAAGCGCAATGG  
CTTATTGCAATGTGTGCGAGTTCTGATTGCATGAACATGGATGTTTTCTCTGCCCTTGTCCTTTCATTCATTCAATTATAAGGATCATATTGGCTGTCATGACAAGACAGTT  
CATCATGTTGGCGGGGTTGAGGGGTTATCTTTCAACTTTAGGGTAGCTAAATTGCACGGCTCACACCTCGCTGGGCGGCACTTTTGTATGAGGATGATTCTACAAGGTG  
GAGAAGAGCCTTGTTACTAGGGATGGAGAGTCCCTGTCGTTGCCACACGGAGATTCTGGTCCGGCGATTTCATTGTGCGCTGATCTCCTTTCTGTATATCCTAAAGCACT  
ACACGGAAGATATCGAGATGAAGCAAAATTGCCATTGCTTGTGCGCAAGGTGAGGCCATCGTGAAGTTCGGGGAAGATGTCACAAACGGACATTTTAAAGGATGAGC  
CGCATTTATGGAACCCCGGCCCGGTG**ACCGAGATTGGGGTGA**

> 10-B

**GCTGCCCATCATAAGTG**GATGGTTATCACGATTTCTGCCAATTACTAATGCATGGTAGGTCATAGGCGAGCTTCCATGGGAATACTACATCCTGTAGGAAGCGCAATGG  
CTTATTGCAATGTGTGCGAGTTCTGATTGCATTAGCATGGATGTTTTCTCTGCCCTTGTCCTTTCATTCATTCAATTTATAAGGATCATATTGGCTGTCATGACAAGACAGTTC  
ATCATGTTGGCGGGGTTGAGGGGTTATCTATCAGCTTTAGGGTAGCTAAATTGCACGGCTCACACCTCGGTGGGCGGCACTTTTGTATGAGGGAGGATCTGATATCAAA  
GATCCGTAATTACATTTCAATCTAGCTCCAGCCACAAAAAATCATCAAACCCCATTAAGTGCATCGTGTCTTATGACTTGAATGTGATGGAGTATGAGGTCTGGGCGCCC  
CGATTGAGGACTATTGGATCATGAGAAGATATATCGAAAAGCGTTGCAGATAACGGCTGGTCTAACACTCCACCATTGGCAGCCTTGTCAGCTGATGTGATGATAGCA  
GTAGAGCGAGGGTATGTATTTTCATCTACAACCTCCAGACTGAACAAATAGCCAGCGATCGTTAAGAAAGAAGGAAATAAAGCGACATGAATTGCTGGCAGCTACCAGC  
CATAAGACTGGCACTGCATAATATGGTAGCTACCTAAGTAGGTAGTGATACTATTAGAGGTACATAACCAAATGACGTCTGCGGGCCTGGAAATGACGGTGTCTCT  
GTTTCATCCACGCTTGCCCTTGTGTTGGACATAAAGCCAGGCGTACAAAGGACACATGACGGATCTATACAGTTGACTGATGTATGTCACGAAAAATATGTTGTCCAGGGC  
ATGATCGACTTGGCATGATGATTCTACAAGGTGGAGAAGAGCCTTGTTACTAGGGATGGAGAGTCCCTGTCGTTGCCACAAAGGAGATTCTGGTCCGGCGAGTCATTGT  
GCGCTGATCTCCTTTCTGTATATCCTAAAGCACTACACGGAAGATATCGAAATGAAGCAAAATTACCATTCGTTGTGCGCGAGGTGAGGCCATCGTGAAGTTCGGGGAA

GATGTCACAAACGGACATTTTCAAGGATGAGCCGCAATTATGGAACCCCGGCCCGGTG**ACCGAGATTGGGGTGA**

> 11-A

**CTCTAATAGTGATGCGAGGTG**GAGGAGGTCACACGGCTGGCCAACTGACACATGCAGATCTACGTAGCCTGTCTCGCAACTGCTTGGCTCTATCACCAGACATGTACC  
AACTTTGTTGCCTCACTTACTGAAGGTAAGTAACTTACCCTGCGGCCTTGTTGTATTGTAGGACTTGCTGGTTTCACGATTAATAAGCTACAACGGGACTTGGAACGAC  
CAAACACTTTGGCCGCTATGACCGCCTTTTGAGCTGATGTTTCTTGGTCTTATTGGCGTGCTCTCTATAAACACATCATCTTGAAGCGGCTTGTGCTTTATGTACCACCTAG  
TAAAGA AACTTACGTTTCACGATCAACTAACTAATGTAGTTGCAGTATCTAACTGCGGCTCCCAACAGATGCTACTAGCTGCATCGGGGTGTCTTAGATCCAACACAAAC  
ACCATCCTCAGGTT CAGCTTACTAGTAAATTCGTAGTGCGATTTCATTGACTATCTTCTGTACGCTGACCATCTAGCCCAGCAACCCAGCAACCCAGCATCTCTAGCCTC  
GTCAATTTAGTCATT CAGTCGTACGAGCAATCTCCGCAAACAAGCGGCTCCTCCCTTCCCCAAGTTCCTACCTATAATTAACGGCATAACGAATGAATGAACACCATCA  
TTGCTTCTTCCACAGACATTATTGCGCCCGC**GACCCAAACAAAACGCT**

> 11-B

**CTCTAATAGTGATGCGAGGTG**GAGGAGGTCACACGGCTGGCCAAACGGGCACATGCAGATCTACGTAGCCTGTCTCGCAACTGCTTGGCTCTATCACCAGACATGTAC  
CAACTTTGTTGCCTCACTTACTAGGTA AACTTACCCTGCGGCCTTGTTGTATTGTAGGACTTGCTGGTTTCACGATTAATAAGCTACAACGGGACTTGGAACGACCAAAC  
ACTTTGGCCGCTATGACCGCCTTTTGAGCTGATGTTTCTTGGTCTTATTGGCGTGCTCTCTATAAACACATCATCTTGAAGCGGCTTGTGCTTTGTGTACCACCTAGTACGG  
AGGTAGCCGCGAAAAGTTCCTGCCCAAGGTGACTTACGCCACAGTAGCTATTTTACTAGGTACAGAGAGATACAGAGAGATAAGATTACTTATAGAGGGATCCCTCTA  
TATCTCTCCTATAGTCTTAGGGATTATAGAGGCAGTAAGCCTGTATAGCTATTGCTTATTTCCCTATAGCGAGATGATGATCAGTGCCTCTTATACTAGCGAAAGTATCCCTT  
GTATCTGTGGCTGGTAAGCTTCTTCAGCCACAGTTTTCTCGGGCAAGAACTTTTCGCGGCTACCTCCGTACAGAACTCACGTTTCACGATCAACTAACTAATGTAGTTGC  
AGTATCTAACTGCGGCTCCCAACAGATGCTACTAGCTGCATCGGGGTGTCTTAGATCCAACACAAACACCATCCTCAGGTT CAGCTTACTAGTAAATTCGTAGTGCGAT  
TTCATTGACTATCTTCTGTGCGCTGACCATCTAGCCCAGCAATCCAGCAACCCAGCATCTCTAGCCTCGTCAATTTAGTCATTCAGTCGTACGAGCAATCTCCGCAAACA  
AGCGGCTCCTCCCTTCCCCCAAGTTCCTAACTATAATTAACGGCATAACGAATGAATGAACACCATGATTGCTTCCTCCACGGACATTATTGCGCCCGC**GACCCAAAC**  
**AAAACGCT**

> 12-A

**TGCCCAGTGATAACGA**CTAAGTAACGGTACTTGTGATGTGGGTGGGGAGACAGTGCGGGCTCGTGGCGCATACTAGTAGATAGCTACTTATGAAACAGCGATATGCCA  
GGCATGTTCTCCATTTGGTGTAACAGTACTAATGCTGGAACGATGACGCTCTTCTTGTGCACTGTATATCTGTGGTCGCGAGAGCGGTGAAGCTCCTTTCTATAAGTA

TCGGTACATCAGCCCCGCGTTACCTACATCTGAGCACGCAGCACGGAACACTACTAACTTTACGGTCATGAGTACAAGGCGGGGTTTAGATCACCCAAATAAGCTTAC  
AGCCGACCTCCCAAAAGAAATTCCAGCACCGTAAAGAGGATTGCAGGCAGATGGAAGAGGAAAGGGGGCTGGCTGGGGCTCCTGATAGACGTTAGGTATCCTCCGG  
CCCATGTTCTTAAATGTACCTCGTAGTACTTACTTTGTTCAGCTTGACCATGTTTCAACATGAAGGAAAGTCTTTCGATGCCTCTTATGATATCCTGTGCCGACGTGGATAG  
TTGAAGACCCTTTACTAAGCTCTGGGCTCATAGACCTGTCGACTTTTATGGATCTGCATTATTCGTGAAACAAATAATCATGGAACAATACCCTGGACCATTATTCCCTG  
CCGACCTTGAAAGTGATGCCGCAACGATCATCCAGCCACCGCCTCAGTACAACACGGCAGCCGGGCCAAGCAAAACCTGACCTTGTTAATTATTACAATGCTTTACGT  
GTTTGCATTATCTGTAGCTTTTGAATAATATCAGAACTGGAGCCCTAGATTAAAAGTATCGTGTATCAACCGGGAATGGTTAGTAACCTTAGTAGTTACCTGAATATCAAC  
TACCTACCTACTGCCTAGGTACTGTAGCTTGACACCTCACCTCACCATACCTGGCAGCTGACTTTCAAGACTGACCTT**CATCATGTTCTTTCCATCT**

> 12-B

**TGCCCAGTGATAACGA**CTAAGTAACGGTACTTGTGATGTGGGTGGGGAGACAGTGCGGGCTCGTGGCGCATACTAGTAGATAGCTACTTATGAAACAGCGATATGCCA  
GGCATGTTCTCCATTTGGTGTAGCAGTACTAATGCTGGAACGATGACGCTCTTCTTGTTCACACTGTATATCTGTGGTCGCGAGAGCGGTGAAGCTCCTTTCTATGAGTA  
TCAGTACATCAGCCCCGCGTTACCTACATCTGAGCACGCAGCACGGAACACTACTAACTTTACGGTCATGAAGGAAAGTCTTTCGATGCCTCTTATGATATACTGTGCC  
GACGTGGATAGTTGAAGACCTTTTACTAAGCTCTGGGCTCATAGACCTGTCGACTTTTATGGATCTGCATTATGCGTGAAACAAAGAATCATGGAACAATACCCTGGAC  
CATTTATTCCCTGTGACCTTGAAAGTGATGGCGCAACGATCATCCAGCCACCGCCTCAGTACAACACGGCAGCCGGGCCAAGCAAAACCTGACCTTGTTAATTATTAC  
AATGCTTTATGTGTTTGCCTTATCTGTAGCTTTTGAATAATATCAAACTGGAGCCCTAGATTAAAAGTATCGTGTATCAACCGGGAATGGTTAGTACCTGTAGTAGTTAC  
CTGAATATCAACTACCTACTACCTAGGTAGGTACTGTAGCTTGACACCTCACCTCACCATACCCAGCAGCTGACTTTCAAGACTGACCTT**CATCATGTTCTTTCCATCT**

> 13-A

**ATGTCTTCAAATGTAACGAGA**AGCTTGAAAACGATCCAAAGAAGCAAAAGGGAAATCGTATCAAGTTTACAAAGGCGCAATATGAGTATATATCCACCCATTACATG  
CTTGGCGGAGTGCTCCTTACAACCCAGAGATATAATGATACAGGGAAGCTAATTGGAGGAGAACTATAAACATAGTGATGTGGGAAATGCTGAAACAAACGCTAGT  
TTTCCGAGCAATGTTGCGATGCCCGTGCTTCTAAGACCAAGATTGGGGCAGGGATGGCAGCTCCTAGCAGACGGTTTTCTGTTTAAAGTGAGCTCCTCTCGGTGATGATT  
GCAACGAATGCCGAACTGCCGCTTATTATTACCTAATTCGGGGGGAGTTGCAACGAAATATCTCCGAAGCTGATGTGATTCCCTTTATGGTATCTTGATAGAATGGTA  
TTGGTGGGGAATTGTCCACTTCAACAGACCCTGGGCATGCCATTTTACATTTTGACAATCTGGATCATTATATCACAATATGTCGCAAGAGCCAATGTTAGTTGCCAGGG  
TGCGAAAATTGGTTTCCGTTCAATATTTCTTTGTTTAGTTTCATCTTCTCCGTCAGATGCCAGATTGCAACAACCTTTATCCCGAAACGATAGTGGTCGTGATAAAGTCC  
TGAGCCTAGCAAAGACTTCCCAGAGTAATCCAGAGACAGAAAATAACCACGAGAGTAATACCGTTTGACGAAGCTCTTGATCCCAAGTTGGATCCCCTACTACTCTGT  
CCTTCAGCACGCCCATCGCCATTCCCTTGGCCATCATGTTCAATTCGAAAATTGTAGTCATCAGTG**TAACCCGCTGGCTCACA**



> 13-B

**ATGTCTTCAAATGTAACGAGA**AGCTTGAAAACGATCCAAAGAAGCAAAAGGGAAATCGTATTAAGTTTACAAAGGCGCAATATGAGTATATATCCACCCATTACATGC  
TTGGCGGAGTGCTCCTTACAACCCCAGAGATATAATGATACAGGGAAGCTAATTGGAGGAGAACTATAAACATAGTGATGTGGGAAATGCTGAAACAAACGCTAGTT  
TTCCGAGCAATGTTGCGATGCCCCTGCTTCTAAGACCAAGATTGGGGCAGGGATGGCAGCTCCTAGCAGACGGTTTTCTGTTTAAAGTGAGCTCCTCTCGGTGATGATTTG  
CAACGAATGCCGAAACTGCCGCCTTATTATTACCTAGTTCGGGGGGAGTTGCAACGAAATATCTCCGAAGCTGATTTGATTTCCCTTTATGGTATCTTAATACAGTGCATA  
GACAAAAGTTCCAATATATCCCGATTATACTCTAACTACCTCGATTACACCCTACTATTTCACTCTGCAATTAAGTGGCAATATTTATTTAATTATAATAATATATATATAAA  
TCTATAGAGAATTAAGGAGATTCTAGCTATATAGCTTAATACTTAATATAGTAGCTATTTATATAATAATACTTATTTAATTAGTTAGGTATTGATTTTATTACGTTTTAAC  
TATATTATCTTTAATTTTAGTTTATAAATTCTCTATAGCTATAATTAGCTAGCTAATTGCCCTAATAGACTTTAGATAAGTAGTAATTTTAGGATATATTTTATATATCCTTTCT  
TAAGGACTTTCTAAAGGTTTTTAATAGGGCTAAGGTTAGGACTATATAGAGGCCAGTTAATAAGAAAGATTTCTTTTCTTCTTGCCTAAAGATAGAGCTAGTTTTAACTT  
TTTAATAAGTAAATATATAGGTATTATTATACTAAAAAGTCTCTCTTCCCTAATAAGGTTAGGAAAATAAGACTGCAGATAGGATAGAATATATTAGCCTATTACTCCCTT  
CTTTTAGATTTAAGATTCTCTAAAAGAGAGATAACTATAGATAGTTTATTATAGTTAATTATACTATAAAATATTTATAAATATCTTATAGGCTATTTATAGGCTTAGACTTTAT  
TTTTATAAAGTCTTTTACCCTATAGTATTATTAAGAAGCTTTTAAAAAAGAAGTCTTTAAATTTATAGCTTAATAAAATAACTACTTAATATAGTTACTATCTATATAGTTA  
ATTATAACCTTATTAGAAAATTACTAACTATACTAAAATAATTTATCTTTATAATAGTATTTATCTATAAAAGATTTCCCTAATTAATAGCTTCTTTAATAAGAAATAGGCAT  
TAAAGTATAAATTTATATTATTTTCTTATTAATAAGCTAGTAATAAATTATCTTTAGTAATACCTTTAGCTATACCTAATTTATAATATCTCTATATAAAATAAAAGGGTTAT  
TTTTAATAAGTATTTTAATATAACTTTTATCCTAATTTAATAGCGCTAAAGGCCTGCTAGAATATAATTTATCTTTATATAACTTTTAGGCTTAAGTGCATTAAATAATCCTATA  
TATTATATAATACTTAGCCTTATACTATCTATAATATCTTTAATCTAACTCCTAATTTATATATTATTATAAACCTTATTCTTTTATAAGAAAAATAATACTTTTTGCCTTTA  
TTAGGGCATTTTAATCTATTTAAATAATATAATGAAGTTATGGTATTAATGTAAATATTTTATTAAGCGGGGTTAGACCGGAATATATCGGAACTTTGCGCGGCCACT  
GTAGAATGGTATTGGTGGGGAATTGTCCACTTCAACAGACCCTGGGCATGCCATTTTACATTCTAACAATCCGGATCATTATATCACAATATGTCGCAAGAGCTAATGTTA  
GTTGCCAGGGTGCGAAAATTGGTTTCCGTTCAATATTTCCCTTTGTTTAGTTCATCCTCCTCAGTCAGATGCCAGATTGCAACAACCTTATCCCGAAACGATAGTGGTCGT  
GATAAAGTCCTGAGCCTAGCAAAGACTTCCCAGAGTAATCCAGAGACAGAAAATAACCACGATAGTAATCCCGTTTGCCGAAGCTCTTGATCCCAAGTTGGATCCCT  
ACTACTCTGTCTTCAGCACGCCCATCGCCATTCCCTTGGCCATCATGTTCAATTGCGAAAATTGTAGTCATCAGTG**TAACCCGCTGGCTCACA**

> 14-A

**CCTCGGTTCTGCTGTCT**ATTCAAGCTTGGGCCCCGGCCCCAATTCTCACTTTCTATGCTGCCTTAACCTTCAGCGTCCAAGCCCAGAATACCAGCAGAGTGACTACGC  
TATAATGGCGTACCCGGGACGATCCTCTTCCCATCCGGCCTGCTGGTTCTTGACACACTGCAATGCAGAGTATACCAGCAGTTCTGGGCTTGAGTACATTTCACTCGATA

TTCACAGGTGGCTATTGATGTTGTGGGTATAAGCCTACTGTGCATCAGCTACAATGTTTACATCTAAAACAAC TAGAAGGACTAAGGAAAGGTCGTTTCACCTGTGACA  
ATTCTTGATCCAAGGGTCCAGTTAGCTGAGTACTTCACTCCTGGTACTCATGGTCCGACGTCGGCTTCAGCATAGCCTTTCGTCAAGTGCTGACATCGTTGGCTGAACGA  
GCTGCCTCCACTGTGCAGTCATGTTTCGCGCAATTTATGTCTCAAACAAACAAAGATCTGCAGATGATGAGACGTGAATCTACTCCTCCTACAGTCACAGTTGTGACATA  
CCGTCAGCTTCTGATAGTACACCCTTTGCCAAAGAACAATGCCTACGGTCTGTTGATAGTCCCTCCACGTTTATTCATACCACACGGGATGACGAAGACTACACTCCCC  
TCCAATCCAAGCGGTTTGAGCAAGTCTTTCAGCTCGGTAAACGGAATGCCCTAACTTGCTCAACGGCACATCTGGGTTTTTCGGATCGAAGGACTGGGCCTGTAAGCCA  
CCAAGCAAACAACCTCGAGGCTTTTTGAATATGTCTCAAAGTCAAGTAATGTTCTTCAAACCTCTGTATGCTCCTTCTTTTTGCTCTTGAGGCGGTTTGATCCTATCACCTC  
TAGCCAAGTTGGAAAGCTTATGTCAAGCCGCGTCTTCTCATCATTGACCTGGGTATAAGCCATGATCATAAATGAGATGGGGCATGAGCCAGTGGGCTTCTGAATGCA  
GATTAAGGCTTCTCAATCAATTGGACAAGGTTGTTCTTTCGAATACCTGTTCTGAAATAACCTTCATATCTTCATATGCGGAGGTAAATTTGCTGGTACTTGTGACTGGCC  
ATGAAACGTAGGTCTCTGGAAGCCCTTTTAATTACAGGTATTTTATGCAGCCTCTGTGGTCTAGTCGGTATCAATGAGTGCTGTGCACTACTTCAAGCACACACATCCA  
TATCGGATCGTGCGGCCACTGGGGCCTGGGTATCAAAAGCTGCAAAAGCAGCTGGCTAGTGCCAAGCTCACTGCGCCATTCTGCAAATCACAGCATCCAGAGAGTG  
AGCAGTTGTTCTCGATTTTTCGAGAAATGCAGCCATAAAGTCACCAGGGTGTCACTTGCTGGTCTCGCTTTTAGATAGCGTCATCCACCAACATGCTGACACTGGCTCC  
GGTCTTCAATCATCGTTGAGGAGGCGAGTTGTCTTGTCTTCGTCCATAATGCTTTCACGGGAGGTATCTTCATCCCTGCTTCGTTTCTCAAAACCCATTTGTCCGTGCTCT  
TCCTCGTCGAATCAAAATTACTCTGTGATGTTTTATCACAAGACCAGTATGTGCTTAGACTCCCCTTGTGTCCCAATACAGCGATGGATTTAAATTGAGGGGCTCCAAG  
AATGATATGAGCTCTAATAAAGCAGGGGTATCCGAAAGGCAGATAGGCTACTTCATCTTTTACCCCTATGTCAGAAGACTCGACAGTTCCCACCCTACGTGAAACACGA  
TTGCACAAAAGCTTGAGAGGTGTCATCCAACCTTTGAGAATTCCTGGCAAAAGAAGCAGCTGTGGGTGCGAATGGCCCAGAACAAATGATTGCTACACGAAGGCACCTT  
TCAGATTTTCGAGGATCTGGGGCACGCCTTTCTCGCGGACAGTAGGGTCTTCTCGTTTCCATTTGTGGTGAACCTTCTCTAGAAGGTAACCCCTGACGTACTACATGTTCA  
CTGGACTAAAGTTCACGGTGCCAGCCAGTTGTTTGTCTTACTCTTACAGACCTCAAATCCAAACATCTGTCTTCAAGATTGCTGATATGCTGCTGTTGGAATGAGTGCAA  
CGCGGCTTCAAGCAACACACTTAACATGGTCCAGATGAGTCTAAGGGGCCCAGGCTTTGCAACACTTTTTTACGGCACGGGGCATCGGCTTCACCCAGTTCGATTTTCC  
ATGCAACCGGATTGTGGAGGCTGGGGGCCTTGTGCACCTATGTTGTATGGTGGGTTTTACCTATAAACCATCGTTGGTTCTGGGAGGGCTCATTACATTGGGTGGCAC  
ATAACCTTCTATGGACTCCTTTCTGTAAAGAGGTCAATGACAAAGTACCTTATCAAGTCACAGTTACGTTTCGGTAATATAGCGGATTTCAAGCGGTCTTCCCCCTGGGGCT  
TTCGGACCTCACATGGCGCAGTGAACCTTTTCATCAGACACTGTTCTTGCTGGGATGTTACGCTGCCTCACCACACTTTACTCACAAACTGTTATCTCGACTTCACAGCCG  
CAAGCTCGTAGATCGTCCGTAGTAGTATCCTTTTCGAGGTAAGGGTGACATCACTTCAAGCAACTCCACAATATCAAAGAAAGAAGTGATTGTGTCCAGGAACATCTTA  
CTGTTGCCAGGACCTTTCTGGCCCTATCGGTTACCGCAGTTTAATCACGGGAGATTTAGTCTTAGAGAATACCAAGCGATGTCAGGACGTTATATATGGTACCAGTCTCAT  
GTATAGTTCAATGGGTTGTCATGATGAGGGGGTCTTCGTGGCGTTACCCCCGTGGGTATGAGAGTTTCGGGTTTCCGTTTGTGGCCAAGACCATCATGACAACCTATTCTGA  
CAGTAACAGCGCAACCAACCTATTTGTGTATTCGACAGAAGACTTCAGACTTCACAGCAAACA

> 14-B

**CCCTCGGTTCTGCTGTCT**ATTCAAGCTTGGGCCCCCGGCCCAATTCTCACTTTCTATGCTGCCTTAACCTTCAGCGTCCAAGCCCAGAATACCAGCAGAGTGACTACGC  
 TATAATGGCGTACCCGGGACGAGCCTCTTCCCATCCGGCCTGCTGGTTCTTGACACACTGCAATGCAGAGTATACCAGCAGTTCTGGGCTTGAGTACATTTCACTCGATA  
 TTCACAGGTGGCTATTGATGTTGTGGGTATAAGCCTGCTGTGCATCAGCTACAATGTTTACATCTAAACAACCTAGAAGGACTAAGGAAAGGTCGTTTCACCTGTGACA  
 ATTCTTGATCCAAGGGTCCAGTTGGCTGAGTACTTCACTCCTGGTTATCATGGTCCGACGTCGGCTTCAGCATAGCCTTTCGTCAAGTGCCGACATCGTTGGCTGAACGA  
 GCTGCCTCCACTGTGCAGTCATGTTAAGCTGCCTCACCACACTTTACTCACAACTGTTATCTCGACTTCACAGCCGCAAGCTCGTAGATCGTCCGTAGTAGTATCCTTTT  
 CGAGGTAAGGGTGACATCACTTCAAGTAATTCCACAATATCAAAGAAAGAAGTGATTGTGTCCAGGAACATCTTACTGTTGCCAGGACCTTTCTGGCCCTATCGGTTAC  
 CCCAGTTCAATTACGGGAGATTCAGTCTTAGAGAATACCAAGCGATGTCAGGACGTTATATATGGTACCAGCTCATGCATAGTTCAATGGGTTGTATGATGAGGGGGTC  
 TTTGTGGCGTTACCCCCGTGGCTATGAGAGTTTCGGGTTTCCGTTTGTGGCCAAGACCATCATGACAACTATTCGACAGTAACAGCGCAACCAACCTATTTGTGTATTC  
 GACAGAAGACTTC**AGACTTCACAGCAAACA**

> 15-A

**ACGGCGTTGGATATATA**GATACCAATCTGATTTTATGCGCCTCTCACCTCCCCCTTTTCTCTCAGTGTCTATGGGCGTTGGAGAAAGGGGAGAGAGAAGAGGTAGGCC  
AATTTCTTTCGGCATGTACACATGATTTAATGCAGCGTTATGATTTTGCTTTTGGTTGGGTGCTTTGCCGGTGGGCGATGGGATACGCGGGAATCTAAGGAACCAGAGTTT  
AAGATAAAAATTTCAAATAGTTTCGCATCGATTCTGTGTTTAGTGAAGTGAAACGTGTTTGTGTTCTGGTGAATGTGTTAAAATGGACTGTAATATGATCATCTCGGCA  
GTCACTCTAACACGGTGCGGTGAGAGTGATTCTGGGAGCCTTTGAGGCTGGTTCACCAGCTTATCGTTCAACTTGGTCGTGTAACATAATCGGTTCCATAGCAAATAGTTCG  
GCATGATTACCATGAATTCTTACACTCTCTATGCCCAAGGACTCTCTATGCCCAAGGACTCTCTATACCCAAGGACTCTCTATGCCCAAGGACTCTCTATGCCCAAGGAC  
TCTCTATGCCCAAGGACTCTCTATACCTAAGGACTCTCTATGCCTAAGGACTCTCTATACCTAAGGACTCTCTATGCCCAAGGACTCTCTATGCCCAACTTCTGGTCATTAT  
CAGGAAGATGATATCAGATGCCGAGCCATATTTGCGATACAAGCTGCATGTAATTTACCTCGAGAGACACGAGTGTAACAAAGTAAGACATGAAAAGCGCCGAGCCA  
GGGGCGCATCGAGATGTGATTTGGGATGGTATCTCTACTGATCCAGATCTCGGCCTCCGCAGCACCAGATTGTGTTTTACCGCCCCGTATTTCCTTGTGATTTCCAACAA  
GAGACAGTCTACAAAACCAGCAAAACCATGAACGATTACATTTACCACACTGGGAGATGACTACGTCAAGGTTCCGGTCTATCCGGGGCAGCATAGCCAGTTTTGGTA  
GCCTCCATCTTCTTTACCACGTCCATGCCGTGCAGCACCCTGCCAAAGACGACATGCTTGTTATCGAGGAAAGGTGTGGGAACAGTTGTGATGAAGA**ATTGAGAACCA**  
**TTGGTA**

> 15-B

ACGGCGTTGGATATATAGATACCAATCTGATTTTATGCGCCTCTCACCTCCCCCTTTTCTCTCAGTGTCTATGGGCGTTGGAGAAAGGGGGGAGAGAAGAGGTAGGCC

AATTTCTTTCCGGCATGTGCACATGATTTAATGCAGCGTTATGATTTTGCTTTTGGTTGGGTGCTTTGCCGGTGGGCGATGGGATACGCGGGAATCTAAGGAACCAGAGTTT  
GAGATAAAAATTCCAAAATAGTTCGCATCGATTTCTGTGTTTGTAGTGAAGTGAACGTGTTTGTGTTCTGGTGAATGTGTTAAAGTGGACTGTAATATGATCATCTCGGCA  
GTCATCTAACACGGTGCGGTGAGAGTGATTCTGGGAGCCTTTGAGGCTGGTTCACCAGCTTATCGTTCAACTTGGTCGTGTAACATAATCGGTTTCATGGCAAATAGTTTCG  
GCATGATTACCATGAATTCTTACACTCTCTATGCCTAAGGACTCTCTATGCCCAGCTTCTGGTCATTATCAAGAAGATGATATCAGATGCCGAGCCATATTTGCGACACTA  
GCTGCATGTAATTTACCTCGAGAGACACGAGTGTAACAAAAGTAAGACATGAAAAGCGCCGAGCCAGGGGCGCATCGAGATGTGTATTTGGGATGGTATCTCTACTGAT  
CCAGATCTCGGCCTCCGCAGCACCAGATCGTGTTTTACCGCCCCGTATCTCCTTGTGGTTTCCAACAAGAGACAGTCTACAAAACCAGCAAAACCATGAACGATTACAT  
TTCACCACACTGGGAGATGACTACGTCAAGGTTCCGTCTATCCGGGGCAGCATAGCCAGTTTTGGTAGCCTCCATCTTCTTTACCACGTCCATGCCGTGACGACCTTGC  
CAAAGACGACATGCTTGTTATCGAGGAAAGGTGTGGGAACGGTTGTGATGAAGAATTGAGAACCATTGGTA

> 16-A

ATGACTCTCGTGTTAAGATAGTCTGGATCGTAGAACTCCTGTGGTGGTAGACTAGCTGTCGCGACTGGAGCAGGCGTGGTGTTCGGCTCTGTTTTGGTATGACCGAGT  
TCTTCTTGCCCGTCCCCTTCTGACTCGCCCCTGGAGGCATGACCGCGGGTGTGTGAGAGTATAAATGAGCGTGGTATGCGCTTGATTGGGGGTTTAGTTGCGCGTG  
GTCTATCAGATAAGATCGAAGGTTGAGTGGAAGATTTTGATGATTATTGCGACAAGGGAACAATAACAGACTGTAACGACACGGCTCTAAAGCACGCGATCCTATTAA  
AGTGCCTCACGGTACAGGTTGGGCGTCGGTACGTACCTGCCCCTTGATGTTCTCAGCTGAGGGGAAACAGATGCCCCGGATGAGACCCTTGCACTTGAAGAGCAGGCA  
CGGAATATGTTTAATTCCGTTCCCTTTCAAGAGCAATCAGAAGCGAACAATTGAATGCCATCATCTTCAATCGTGAAGTCTCTGGTATCAGTACAAGTCACTGTCGCTAAC  
GACTTTTCTCCGGATCCTTAGATTCAATTCTGGCTGCAAAGCCCTATTCGTGACGCTGCAACTCATTGACACTTACATAGGATGGCGACTCTCTTTGTAGTCAAACAGT  
TATGAAAAACCATAATTGATACGAGAGCCGAGCTACGGCAATCCGACTTCATATACATAATCTTCAAGGAAGCCCGTTGATTGGTTTATCCAAAGTCAGCAGCGAAAG  
GCAGTATCACTAACTTCAAATTAAGGAACTTGACTTGAAATCAAGGTGTCAAAATTAATAATCTATAGGCATAAAGTTATACGGACTTTACCCAAGTCATAGGATAAA  
AGTTCTACACATGCAAATACTCCCTACCAAGACTCGGGCCTCAAAGCCACCAAGTGTTTCGGGAGGGTTAATAAACCAAGTCAACTGCATTTTTGCCAGCAATTTACTT  
TGACGACCAAGATCGCGTTATTTGTCTGGACTAGATCAATCATGCACAAAACGTGTAATGACTCGCAGTGCAACCTTTCTATAGGTGCAATGGAGTTGCACGTTCTTTG  
ATAGTTCTTCTTACTCGCGGCAAACCAGAAGAAAGCCCTCAACTTCATTCAAAACTTGGTCTTTGGGAAACAAATTGACAGTGCTTTTGTCACTGTCGATAAACACCAA  
CACTGGAGGCATCAGCATCACCCATTAACAAATCATTGATGTTCAAAGAATAAATGGAA

> 16-B

ATGACTCTCGTGTTAAGATAGTCTGGATCGTAGAACTCCTGTGGTGGTAGACTAGCTGTCGCGACTGGAGCAGGCGTGGTGTTCGGCTCTGTTTTGGTATGACCGAGT  
TCTTCTTGCCCGTCCCCTTCTGACTCGCCCCTGGAGGCATGACCGCGGGTGTGTGAGGGTATAAATGAGCGTGGTATGCGCTTGATTGGGGGTTTAGTTGCGCGTG

GTCTATCAGATAAGATCGAAGGTTGAGTGGAAGATTTTGATGATTATTGCGACAAGGGAACAATAACAGGCTGTAACGACACGGCTCTAAAGCACGCGATCCTATTAA  
AGTGCGTCACGGTACAGGTTGGGCGTCGGTACGTACCTGCCCCTTGATGTTACAGCTGAGGGGAAACAGATGCCCCGGATGAGACCTTGCACCTGAAGAGCAGGC  
ACGGAATATGTTAATTCCGTTCTTTCAAGAGCGATCAGAAGCGAACAATTGAATGCCATCATCTTAACTTAACTTGAAATCAAGGTGTCAAATTCACCTAATCTATAG  
GCATAAAGTTATACTGACTTTACCCAAGTCTTTTGTTCATCCATAGAATAAAAGTCCTACACATACAAATACTTCTACCAAGACTCAGGCCTCAAAGCCACCAAGTGTT  
TCGGGGGTTTGATAAACCAAGTCAACTGCATTTTGGCCAGCAATTTACTTTGACGACCAAGATCGCGTTATTTGTCTTGGACTAGATCAATCATGCACAAAACGTGTAAT  
GACTCGCAGTGCAACCTTTCTATAGGTGCAATGGAGTTGCACGTTTCGTCGATAGTTCTTCTTACTCGCGGCAAACCAGAAGAAAGCCTTCAACTTCATTCAAACTTGG  
TCTTTGGGAAACAAATCAACAGTGCTTTTGTCACTGTGCATAAACACCAACACTGGAAGCATCAGCATCACCCATTAACAAATCATTCATGTTCAAAAGAATAAATGGA  
A

> 17-A

GTTTCGTCGCCAAAGCTGGAAGAGTCTCGACGAGAAGAACGATCCATCGCGGATACGGAATGATGAGATAATTTGCTGAATGCACGATGAAGGGCACAATCGCATTC  
ACGAGGCCTGAGAGTGAGTGGTCAGTTGAGGCTTCATGTGAAGACATCCGATGAAGCAGTCAAAATTACCGAGAATCGCAAAACCGAGGTACGTTTGCATCGTAACA  
CTCAACCTCGAGCTCTTCTGAGCATCCATATTGAACTCCATCACCTCAAATCCTCCATGAAAGAGTCAGATTAAAAAAGGAAGTGAATCAAGAAAAGAGGCTTTTCA  
ACAAAGAACAAATCAACCAATACTTTACGCAGCCTCAAGTCAATAAATGCAATGTAAGCTTATTTATTTAACCTCTGCTCTGGCCGAATACGGTTTACGGAGCCCAA  
ACACCGCGCGGATAAATACGAGAGGCCATGACTCTAATAGACTACCTTCCTTACCTTAATAGGAATTATAGAGCATCTTGTTACGAATCAATTCATCACCAGCGTAAAT  
GACGTACAGAGATTGGATGGAAGAGGAAGCTGATGTAGAACCTCTTGTGGGCCACGTGGGGCTGTTTTCAAGGGCACGATGTCGAGTGATTGGCTGTAGCGTATTGA  
TTCAACGCTAAAGATCTGCGGTGAATAGTGGGTTCATGATGGATTACAGAGGCTAGAGTCATGATAGATAAACTACATAGTACAATCTCATGAGGAGATGAAGGACA  
AGATGATGATCATGGATCACAAGGGTCTCTTAGTATTCATATCTACTCAAGATGATTGTAGCACTCCTATCAACATGATCAAGGCGATCTGCAATGACCTCGTCTTCAAT  
ATCACATCGCTCGTCTCCATGATGAGAAGAGCTCCAAATGCTGACCCTGAAGATGCATCGTTTCCATCTGCCAGTCAGCTCGACCTGTTCTAGCTCAGCTGAAGCCA  
TCATGGTT

> 17-B

GTTTCGTCGCCAAAGCTGGAAGAGTCTCGATGAGAAGAACGATCCATCGCGGATACGGAATGATGAGATAGTTTGTGAGTGCACGATGAAGGGCACAATCGCATTC  
ACGAGGCCTGAGAGTGAGTGGTCAGTCGAGGCTTCATGTGAAGACATCCGATGAGGTAGTAAAAATTACCGAGAATCGCAAAATCCGAGGTACGTTAGCATCGTAACA  
CTCAAGCTCGAGCTCTTCTGAGCATCCATGGTAACTCCATCACCTCAAATCCTCCATGAAAGAGTCAGACTAAAAAAGGAAGTGAATCAAGAAAAGAGGCTTTTC  
AACAAAGAACAAATCAACCAATACTTTACGCAGCCTGAAGTCAATAAATGCAATGTAAGCTTATTTATTTAACCTCTGCTCTGGCCGAATACGGTTTACGGAGCCCAA

AACACCGCGCGGATAAATACGAGAGGCCATGACTCTAAAAGAATACCTTCCTTACCTTGATAGGAATTAACGTCCCCTACCTAAAGACCGGCCACCCCTACAGACTGG  
CCACCTCATTCTTAACCCAGCCACCTAATTTATATATACTTTAAACAGTTATAACTCTATTAATTTAATTCTAATTAATTTTAAACTAATACTAATTAATTTAGAATGCCTTCT  
TTTACTAAAAAAGATATAAGCGTTGCACTTTAGATAGTTATAAATAGTATATCAGTAAATAAAGTAGCTAAAGCTTATAGTATTAACCGTTCTATACTTTAAGGTTAGATTA  
AAGAAAGTATAATACTAAAAGAAGCCTAAAAATCTTATTTAAAGCTTTTTAATACTTAAAAAAGAGTTTTTAAGACTAGATTATTATTTAAGTTAATCTAGAATGCCCTA  
TATTATATTAGTAAATTTAAAGTTTACCAGTAAAATTACTATCTATAATAGCTTCCTAAAAGGCATTAAAAAGAAGTAGTTATAGGGCTTTTTAGGATAAAAATCCTAATAT  
TAAGATATTTAAAGGTAAGAAAATTAACCTTTAATTAATATTATAGAGTTTCTTTTAACTAATAAAGGCATTCTTTATACTCTTTATAATACTAGCAATACACTTAATTAAGT  
AGGGGAATAGATATAATATTAATAAAGTTAAATAATAAAGGAATAGAAATAAACAGTTTATTCTTTAGTTATTAGTTAAAGAAGTTAGTACTTATTTATTAGTTTGGTTT  
TTATACCTAGATTATAATTCTTAAGTATATTTTAGTAATTTAAAGGTCTTAAGACCTATAATTATTTTAAAGAGAAAAATAGTTTAATAATAATATTTCCCTAAGAATTTAG  
ACTTCCTAAAAGACTAAAAATTTATATATAGTAATAAAGGCTAGATAAGCAATAAATTAGCATTAAATTTAATTAAAAAAAGTCTTTATTCTATTAATATAGCCTAAAAAGA  
AAAAATAACCCTAACTTTTTATTCTTAATAGCTATAGAAGTTATATTATAGAAGATTTCTCTAAAAATATTATAATAATAATATATATCTATTATTTCTTTCTATTTATATTTT  
TATATCCTTTAGCTACTAGATATTACAGTTTTTAGTTCTCTAAAGAGGGCATATTATTATCTTCTTTTAGATCTTACTTCTATCTTTAATAATAGTTATATTAATAAAATTATATT  
TCTATATACTTATAATAAGGCTTAGAGAGAAGCTATTATAAAGTCTAATATAATTACTAGCTTTAAAGCTACTAGACTGTGGCCTATAAACCTAGTAAAGGTCCTAATAAA  
CCTAATAGTTATAGAGATACTTTTTCTGCTATTATAGTAAATTTACCGATAAAAAAGTAAGATTTAAGTCTCTTAAAGACTCCTTATTTATCTATATAGCTTTAGTAAGCTTT  
AGGCTAAATCCTAGCTTCTATAATATAAAATCTAACTATTAGGCTGCTTTTTAAGAAGATTAGCAGTTAATTAAACTATTATAACTTTAATATTAAGTAATAAAATAGAGAA  
ATAAGTATTTTATAGTAAAAAATAAAGAAAATTAATTTAAATAATATAAAAAAGTTATTTATAACTTAAATATAGAGTTTATAAAGATTCTAGTAATAAAGAAAGCTTAT  
AAATAGATATAAAAAACTTTATAACTAAAAAAATAATAAATAAAATTAAGAAATTAAACTTAAGGATCTTTATATTAATTTCTATATAAATATTTACTAACTGAAGTTTT  
ATTTAATATAAAAAATATAGTGTATAATAATTTATTAATTAATTATAATATTAGGTTTTTGGTGTTTTGGCTAAGGTGGCTAGTCTGTAGGGGTGGCCGGTCTTTAGGTGGG  
GGACGTTATAGAGCATCTTGTTACGAATCAATTCATCACTAGCGTAAAATGACGTACAGAGATTGGATGGAAGAGGAAGCTGATGTAGAACCTCTTGTTGGGCCACGTG  
GGGCTGTTTTCAAGGGCACGATGCCAAGTGATTGGCTGTAGCGTATTGTTTCAACGCTAAAGATCAGCGGTGAATAGTGGGTTCATGATGGATTACAGAGGCTAGAGTC  
ATGATAGATAAACTACAGTCTCATGAGGAGATGAAGGACAAGATGATGATCATGGATCACAAGGGTCTCTTGGTATTTTCATATCTACTCAAGATGATTGTAGCACTCCC  
ATCAACATGATCAAGGCGATCTGCAATGACCTCGTCTTCAATATCACATCGCTCGTCCTCCATGATGAGAAGAGCTCCAAATGCTCACCTGAAGATGCATCGTTTCCAT  
CTGCCCAGTCAGCTCGACCTGTTCTAGCTCAGCTGAAGCCATCATGGTT

> 18-A

GCGTGTTGACCCATTCTGCCAACACCCCTCCTCAAATCAGTACTGTCTGACTTGGTAGCACAATGTGACATCTAAAAGCACTAGTTATGTGTAATTACATGCACACTGT  
ATCACAATATCACATATCGGTCGTGGGATTAGGGTGCGAGGGGCGTTGACTAGATTGAAGCTGAACGATGTTTTGAGAAACAGTGGCATTAAATATGGCTGAATGTGACC

AACTACAATGCCCTATGGTAATTTCAAGTTCTCCACCTGGGTCGACCTTATTATTTTAATATTAGTTATATAATATTATATAATAAACCGGCACTATATAAAAAGGAGAAAAA  
GACTTAATGTATTTACTGAAGAATATAGTTAAAAGATAGCATAAAAATTAAATTTTAAAAATCAAAAGGCTTCAGAAATGCAAGAAAAAGTGATTTTATAAACTTACTG  
TAGGGCCTGGTAAGCCGCGATCCTCCCTCGTGATTGTGGCCTAATTTACACATATCGACTTTGACAAGGGTGCTTCCAGGTTTATGAAAGTATTAGTTCTTTTGTACCCAA  
TTTTTCCAAGTAAACGTGAGCCCCCTTACCTCAATCGTTTGAAACATGCCAGGGTTTTGCTTTTTTCCACCTGAAGGCGTCATGGCCGAGTTTGATCAAAACATTACAGA  
CCAGACCTACTGTAACATATAAAACATAGCACATTCCTGTTATCCAAGAATGGAGTTGGGAATCATAAATATCTGGTCCGATCTATTTCCCTGTATATCAATAATCGCCTTCTC  
AAACATGTCTATCACTATCGACAGAAATCTCTTAACAGCATGCCCCAACGAGAATATTTCCGCCGAGAGCATTTCGACTCCCTCTCGACGTAGTCGAGTACTTATGCTCAC  
AATCTAAGAACAGTACGGGACACACCCAGAGGCAGAGACTTGGAACCCCTGCGCCAGTTGGTCAGTAATTTGTCCCAAAATATCCCACCAAATTTACAGGCATAGGTC  
TCGGGGGCTTTCTCCTTTGTGCAACACCCGTCTCACTGTCAGTCTCGAGCTCCAAGGAGTAGGAGTTTTGCTGCTGCTGCAAATATGTAAGGAAAGCCGCTGATCAC  
CGGCCAAACTTGCTAACCGTCGACAGTGGTGCCTATCTGGGACTCGGCAGTGTGATGCTTATCCTTGGAGGGATTGGCGAGTGGGTTCTGGGTAAGTTAGCTGAACTCA  
TATGATCTACCGACACTCACATATCAGGAAACACGTTTTCTTCTGTAGTATTCTGCCTTTTTGGCGGCTACTGGTTGACTTTAGGAATAACGATCATTCTTGATCTGGTGC  
ATATGGCATTTACTCAACTACCGAATCAGCTGTAGATGTGCTTGATAATCCTCAGTTCTACGCTACGTTTTCTTTCATCCTCGTTGCTATGACGATACTCTGCGCCCTTCTTA  
CAGTTGCAAGTATTCGAACCAATATCGTTTGTTCTTTATGTTCTGTTCTCCTCACTACTTACTGTAAGATTCTTATGCCTTGCTCCTCATTGTAACGACTGACAGGGGTCT  
TTTTATAGTTGGCTGTCTTGCTGGTTCGTTTTTACATTCATGGAAAAACCTTCAAGTGCTCTTTTATTACAAAAGGTGGGTGCTGGGTTTCTTTTTGCAGCGACGATACTG  
GGTTGGTACATGTGGTTTGCTCTTATACTCTTATCCGTCAACTTCCCGATTTCTCTACCTGTGGGTGAGCTTTCGTCAATCGTTCCCGGCCGGAACAACCAGGCAGAAATG  
AAAAACACGAAAGATGCTTAAGCTCTTTACTCGGGCAGTTATTCGGCTGTATAAAACCAGAGTTGAAAGTAGGCGGGTACGATTGTTTAGCTCGATGGTTTCAAAAGCT  
CAGTAGTGGATAAGTTCCAGTGCATCGTGTAGCTGGAACAATTTCTATTGTATCTTTGTAAATATTCTGGTTATTTAGACGAAAGCAAGAGATTTAATGTAATCTTCAATAT  
CCCTCCAGTGGCTAAATCAAGTTGCG

> 18-B

CGGTGTTGACCCATTTCTGCCAACACCCTCCTCAAATCAGTGCTGTCTGACTTCGTAGCACAATGTGACATCTAAAAGCACTAGTAATGTGTAATTACATGCACACTGT  
ATCACAATATCACATATCGGTCGTGGGATTAGGGTGCGAGGGGCGTTGACTAGATTGAAGCTGAACGATGTTTTGAGAAACAGTGGCATTAAATATGGCTGAATGTGACC  
AACTACAATGCCCTATGGTAATTTCAAGTTCTCCACCTGGGTCGACCTTATTATTTTAATATTAGTTATATAATATTATATAATAAACCGGCACTATATAAAAAGGAGAAAAA  
GACTTAATGTATTTACTGAAGAATATAGTTAAAAGATAGCACAAAAATTAAATTTTAAAAATCAAAAGGCTTCAGAAATGCAAGAAAAAGTGATTTTAATAAACTTACT  
GTAGGGCCTGGTAAGCCTCGATCCTCGACTAACAGGGGTCTTTTTATAGTTGGCTGTCTTGCTGGTTCGTTTTTACATTCATGGAAAAACCTTCAAGTGCTCTTTTATTAC  
AAAAGGTGGGTGCTGGGTTTCTTTTTGCAGCGACGATACTGGGTGGTACATGTGGTTTGCTCTTATACTCTTATCCGTCAACTTCCCGAGTTCTCTACCTGTGGGTGAGC  
TTTCGTCAGTCGTTCCCGGCCGGAACAACCAGGCAGAAATGAAAAACACGAAAGATGCTTAAGCTCTTTACTCGGGCAGTTATTCGGCTGTATAAATCCAGAGTTGAA

AGTAGGCGGGTACGATTGTTTAGCTCGATGGTTTCAAAAGCTCAGTAGTGGATAAGTTCCAGTGCATCGTGTAGCTGGAACAATTTCTATTGTATCTTTGTAAATATTCTG  
GTTATTTAGACGAAAGCAAGAGATGTAATGTAACCTTCAATATCCCTCCAGTGGCTAAATCAAGTTGCG

> 19-A

AGTATCTGAACCAATGCCACTTGTGGAGTGTTATAGACAATGGGCTTGGACAAGTTCAAAACATAGGTTCAACAGACCATTCTCAGGTACAAGGCCTTTTCCTTCCTGG  
GCGTCTTTGGTGTCTTCAAGCCCATCCTGAGTTTGATCCAGCAGTTATGGGACAGGTGCTAGACCTGACTAGATCTGAATTGACAGATGAGGAATACCGAAAGGCAAA  
GGCTCATAACCAACAAAAGCTTGACCAACAAGTCGCACTAGAAATCATTAGTTAATTTTATTCTAGAATAAGATATTTATAATATTTCCCTTTATATTATAGAATATATAGTTAT  
AACTATATAATATAGTAAATATATCTTAAGAAAATAGTTTTAATTTATCATTATATTTTACAAGTAAAGTTAAATAATAACATACTTATACTTCTTTTCTTTTAAAGTAAAT  
ATAATTATAAATAATAGGAAGATATAAAATTATCTATAATATTTTATAATATATTTCTCTCCTTTTAAATACTAGATAAAATATATTTTACTTTATTAGGCCGCTTTACAGCG  
CTTCATATTTAAAGATAACAAATTGCAAATATATAAATACTTCTTTCCCTTCCCTCCACCAGGTCAGGGGTATTCTTTCAAGTATTACAAACATCTTGATTCTTAGAGGTA  
CTTTACCGCCCCCTGGTAATATTTGTTAAGCCCAAAAGCAAGTAAAGGTTACGATTTCAGTCTATGCACATTATGCCCACACTGCCACATGCCACGTCATCACTTACGATGA  
GAAGCTTACAATAGCTAGAAATGCCTTGAAGCCTTCAACGCTGAACGGGCTTCCTTTCCCAACTCTCAAGCCAGATATGGTATTGGAAGTAATATCCAACAGAACCCCC  
TCACCTGACTTTAAAATAACCGGAATATAGTGGATGCCAATAGCATTGAGGAAGGAAACGCAATCATCGATGCCTATATGGGACAGGATCGAATCATGAAAGAAGTAA  
CTAGGGATCAGAAATAAGAGGCTTACTGGGAAATACTCGCTGAGTTCCCAGTAAGTATGGCAAAGAACGATTTTATAAGTCCTTCTGGGTAAGCGGCTTTTCGGCATAAT  
TGAAGAACATGTATTTCTCAACAACCTTTACAAGCGCTTAAGATTGACTTATTTAATTTAAGGCTGAATTACGCTATATAGTGCCGATATAGAGCCCGCTTTAGCTTCTCAA  
ATAGGATATGTTATTATGACGACTTTTGCAAAAATAAATATATTTTAAAGAGTGCTTTGTAAATTTCTTGCCTAGGGAGTTTTGACATAGCGTGTCTGTAAGAATGACCAGCA  
TCTAAACACAGCGTAAACAGAAATCCGATCAGTGGGCTTCGTAACAGTTTTGAAACTCAGCAGCTAGTTCCCTTCT

> 19-B

AGTATCTGAACCAATGCCACTTGTGGAGTGTTATAGACAATGGGCTTGGACAAGTTCAAAACATAGGTTCAACAGACCATTCTCAGGTACAAGGCCTTTTCCTTCCTGG  
GCGTCTTTGGTGTCTTCAAGCCCATCCTGAGTTTGATCCAGCAGTTATGGGACAGGTGCTAGACCTGACTAGATCTGAATTGACAGATGAGGAATACCGAAAGGCAAG  
GGCTCATAACCAACAAAAGCTTGACCAACAAGTCGCACTAGAAATCATTAGTTAATTTTATTCTAGAATAAGATGTTTATAATATTTCCCTTTATATCATAGAATATATAGTTA  
TAACTATATAATATAGTAAATATATCATAAGAAAATAGTTTTAATTTATTATTATATTTTAAAGTAAAGTTAAATAATAACATACTTATACTTCTTTTCTTTTGAGTAAAT  
ATAATTATAAATAATAGGAAGATATAAAGTTATCTATAATATTTTATAATATATTTCCGGAATATAGTGGATGCCAATAGCATTGAGGAAGGAAACGCAATCATCGATGCCT  
ATATGGGACAGGATCGAATCATGAAAGAAGTAACTAGGGATCAGAAATAAGATGCTTACTGAGAAATACTCGCTGAGTTCACAGTAAGTATGGCAAAGAACGATTTTA  
TAAGTCCTTCTGGGTAAGCGGTTTTTCGGCATAATTGAAGAATATGTATTTCTCAACAACCTTTACAAGCGCTTAAGATTGACTGATTTAATTTAAGGCTGAAATACGCTATA



TAGTGCCTATATAGAGCCCGCTTTAGCTTCTCAAATAGGATATGTTATTATGACGACTTTTGCAAAAATAAATATATTTTAAGAGTGCTTTGTAAATTTCTTGCCTAGGGAGT  
TTTGACATAGCGTGCTGTGAAGAATGACCAGCATCTAAACACAGCGTAAACAGAATCCGATCAGTGGGCTTCGTAACAGTTTTGAAACTCAG**CACGACTAGTTCCTT**  
**CT**

> 20-A

**AAAGCAGTGGCGAACAT**CAACTTGACTACTTTCAAGTCGTCGGGACCGATGATGGTGGTATCTTGCAGAGAAATTCGCCCCGATCTATGTGCGAGACAGGATTGCAATG  
GAGCCATATAACTTATCGACGTTGCTTCGAATCATTTCCATATCAAGGAAAGGATGTGAGATATTAATCTCTTCTTCGTAAACATTGCAAAGCCGCAGCGCCTCTGGTCTG  
TCGATCAGCCAAATTGGATCGACAGGGGGCTCATTTCGATAGCGCAGTTTGTGGTGTAGGCGATGGCCGTCGGGTATTATTTCCAGCAGTCCATGCATCGCTATTATCGTT  
GTGCGGTTGAGAGATACCTCGAGCAAGAAGGCTTGATTGTGCAAGGCTAATGTTGAACTTGTAGTGAGCAGTTGCAGGTGTATAGATGCTTGCTGCGCCGGCTTCGGAG  
CTGCGGTTACTGTGCGACTGAGTAGGTATTTAGAATAGGGGGGGAGTTGAGGGATACGTTTAGATCAGTATTCATACTTTGTTGCATAGGCACATTGTCCTGACCTGGAAC  
CTGTGCGAGGAGCTGAAGAATTTGTAAGAGGTTGCGGCGGTGACGGCGAAGGCGACGAAGCAAGATGCGTAAGGTCTGAGTTGTTGAGAATGGCTTCTTCGATGCTTGT  
GTCAAAGGCAACTCTAGTAGATGAAGGATTTGTTGGGGCAGGCGGCTGGGCTGGTGATGACCGGATGTGATCTTCAATATCAGCCAACCTCTTGAGAATCACCTTGTG  
TCATTTGTCTCACTATGGGGGTCAGTGACATTTTGTCTAAAGCTATACCCAAGAAGAAACAAGGCTTACAGAGTTGTCCCTCGGCGACGGGGCACATGTGGAGGAAAC  
GTACCTGTTTGGTGTAAGTTGTTTTCAGAGCGCGACCATGGCGAGAATAACTTACAATCCTTACCGGCTTTAGCGCATTGGCTACATGGACGTTGCTGTTACATTTAGTT  
TTGCGCTTCTTGCAATTCGTAACATGAGGTCACAAGAATGAGCTTCTAGACATCCAAGTGTCCAAGTAGCGAAGAGGTACCAGGCGAGATTTGTATATTGGCC**TCGTT**  
**TTCGTTTTGCTG**

> 20-B

**AAAGCAGTGGCGAACAT**CAACTTGACTACTTTCAAGTCGTCGGGACCGATGATGGTGGTATCTTGCAGAGAAATTCGCCCCGATCTATGTGCGAGACAGGATTGCAATG  
GAGCCATATAACTTATCGACGTTGCTGCGAATCATTTCCATATCAAGGAAAGGATGTGAGATATTAATCTCTTCTTCGTAAACATTGCAAAGCCGCAGCGCCTCTGGTCT  
GTCGATCAGCCAAATTGGATCGACAGGGGGCTCATTTCGATAGCGCAGTTTGTGGTGTAGGCGATGGCCGTCAGACATCCAAGTGTCCAAGTAGCGAAGAGGTACCAG  
CGAGATTTGTATATTGGCC**TCGTTTTCGTTTTGCTG**
